# Supplementary material for: Electrochemical C3-methylthiolation of imidazopyridines with dimethyl sulfoxide
Source: Royal Society of Chemistry journal article supplement (doi:10.1039/d4gc00314d), 2024-01-01

## Electronic Supplementary Information

for

# Electrochemical C3-methylthiolation of imidazopyridines with dimethyl sulfoxide

Zhaoyue Feng, Yingsibing Fan, Congcong Qiang, Ping Liu\* and Peipei Sun\*

*School of Chemistry and Materials Science, Jiangsu Provincial Key Laboratory of Material Cycle*

*Processes and Pollution Control, Jiangsu Collaborative Innovation Center of Biomedical*

*Functional Materials, Nanjing Normal University, Nanjing 210023, China.*

*pingliu@njnu.edu.cn; sunpeipei@njnu.edu.cn*

### Contents

|                                                                            |         |
|----------------------------------------------------------------------------|---------|
| 1. General information.....                                                | S2      |
| 2. Experimental procedures<br>.....                                        | S2-S4   |
| 3. Mechanistic studies<br>.....                                            | S4-S9   |
| 4. Experimental data for the products <b>2</b> and <b>3</b> .....<br>..... | S9-S18  |
| 5. References<br>.....                                                     | S18     |
| 6. <sup>1</sup> H and <sup>13</sup> C NMR spectra of the products<br>..... | S19-S47 |

## 1 General information

All reagents were obtained from commercial suppliers and used without further purification. Reactions were monitored by thin layer chromatography. Column chromatography was performed using silica gel (300–400 mesh). The NMR spectra were recorded on a Bruker Avance 400 spectrometer at 400 MHz ( $^1\text{H}$ ) and 100 MHz ( $^{13}\text{C}$ ) in  $\text{CDCl}_3$  using tetramethylsilane as the internal standard. The following abbreviations were used to explain the multiplicities: s = singlet, d = doublet, t = triplet, dd = doublet of doublet, dt = doublet of triplet, td = triplet of doublet, q = quartet, m = multiplet. High-resolution mass spectra were obtained with an AB Triple 5600 mass spectrometer by ESI on a TOF mass analyzer. Melting points are uncorrected.

## 2 Experimental procedures

### 2.1 General procedure for the electrochemical reactions

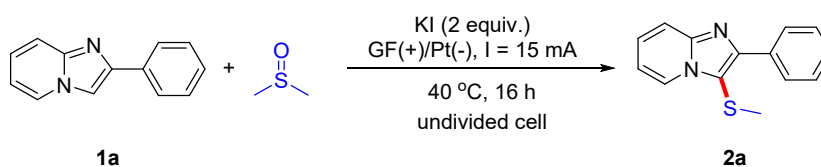

In an undivided three-necked flask (25 mL), 2-phenylimidazo[1,2-*a*]pyridine (**1a**, 97.1 mg, 0.5 mmol), KI (166.0 mg, 1.0 mmol), and DMSO (10 mL) were continuously added. The flask was equipped with a graphite felt electrode (30 mm × 10 mm × 2 mm) as the anode and a platinum plate electrode (10 mm × 10 mm × 1 mm) as the cathode (Figure S1). The distance between the electrodes was 10 mm. The reaction mixture was stirred and electrolyzed at a constant current (15 mA) under air at 40 °C for 16 h. After being cooled to room temperature, the resulting solution was diluted with EtOAc (10 mL). The organic layer was washed with water (10 mL). The aqueous phase was re-extracted with EtOAc (10 mL × 2). The combined organic layers were dried over  $\text{Na}_2\text{SO}_4$  and concentrated in vacuum. Subsequently, the crude residue was purified by silica gel chromatography using petroleum ether/ethyl acetate (5:1, v/v) as eluent to afford the desired product **2a**.

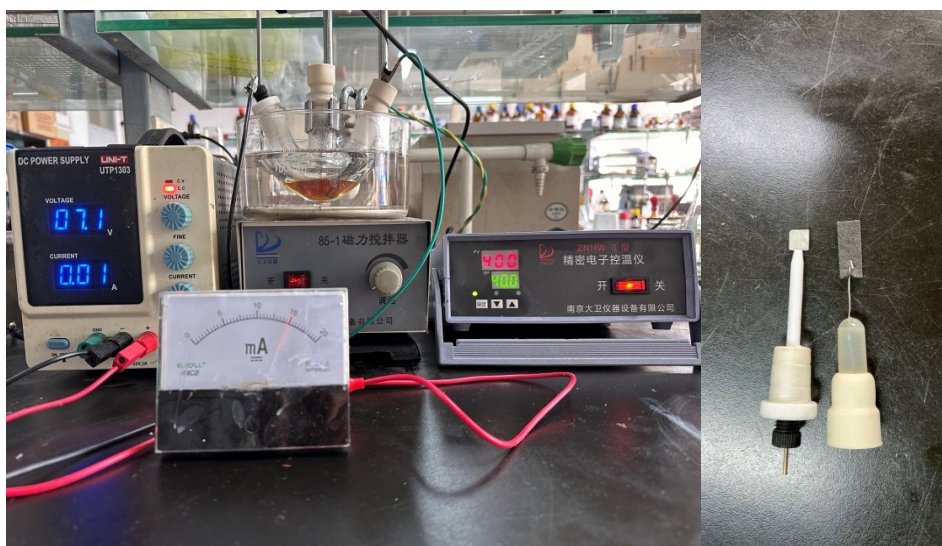

**Figure S1.** The electrochemical reaction setup.

## 2.2 Gram-scale synthesis of **2a**

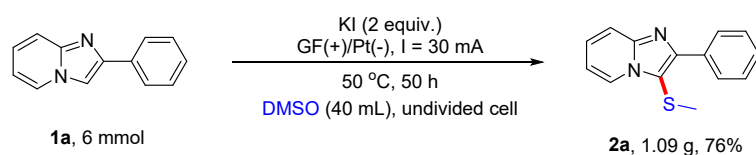

In an undivided three-necked flask (100 mL), 2-phenylimidazo[1,2-*a*]pyridine (**1a**, 1.16 g, 6 mmol), KI (1.99 g, 12 mmol), and DMSO (40 mL) were continuously added. The flask was equipped with a graphite felt electrode as the anode and a platinum plate electrode (15 mm × 15 mm) as the cathode. The reaction mixture was stirred and electrolyzed at a constant current (30 mA) under air at 50 °C for 50 h. After being cooled to room temperature, the resulting solution was diluted with EtOAc (50 mL). The organic layer was washed with water (50 mL). The aqueous phase was re-extracted with EtOAc (50 mL × 2). The combined organic layers were dried over Na<sub>2</sub>SO<sub>4</sub> and concentrated in vacuum. Subsequently, the crude residue was purified by silica gel chromatography using petroleum ether/ethyl acetate (5:1, v/v) as eluent to afford the desired product **2a**.

## 2.3 The transformation of **2a** to **3**

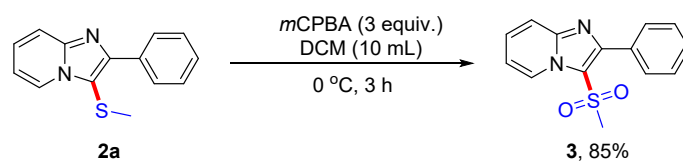

In a Schlenk flask (25 mL), **2a** (0.5 mmol, 120.0 mg), *m*CPBA (1.5 mmol, 258.9 mg) and DCM (10 mL) were added in sequence. After stirring for 3 h at 0 °C, the mixture was quenched with

water, and extracted with ethyl acetate, and the combined organic phases were dried over anhydrous Na<sub>2</sub>SO<sub>4</sub>, filtered, concentrated in *vacuo*. Subsequently, the crude residue was purified by silica gel chromatography using petroleum ether/ethyl acetate (1:1, v/v) as eluent to afford the desired product **3**.

### 3 Mechanistic studies

#### 3.1 Control experiments

##### 3.1.1 Deuteration experiments

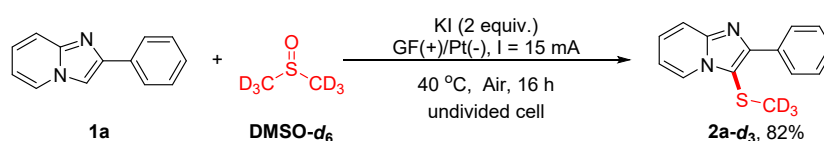

In an undivided three-necked flask (25 mL), 2-phenylimidazo[1,2-*a*]pyridine (**1a**, 97.1mg, 0.5 mmol), KI (166.0 mg, 1.0 mmol), and dimethyl sulfoxide-*d*<sub>6</sub> (10 mL) were continuously added. The flask was equipped with a graphite felt electrode as the anode and a platinum plate electrode (10 mm × 10 mm) as the cathode. The reaction mixture was stirred and electrolyzed at a constant current (15 mA) under air at 40 °C for 16 h. After being cooled to room temperature, the resulting solution was diluted with EtOAc (10 mL). The organic layer was washed with water (10 mL). The aqueous phase was re-extracted with EtOAc (10 mL × 2). The combined organic layers were dried over Na<sub>2</sub>SO<sub>4</sub> and concentrated in vacuum. Subsequently, the crude residue was purified by silica gel chromatography using petroleum ether/ethyl acetate (5:1, v/v) as eluent to afford the desired product **2a-d<sub>3</sub>**.

##### 3.1.2 HRMS analysis of the homo-coupling product 1,2-bis(methylsulfinyl)ethane (**4**)

**4**, HRMS (ESI-TOF) *m/z* [M+H]<sup>+</sup> calcd for C<sub>4</sub>H<sub>11</sub>O<sub>2</sub>S<sub>2</sub><sup>+</sup>, 155.0195; found 155.0198. (Figure S2)

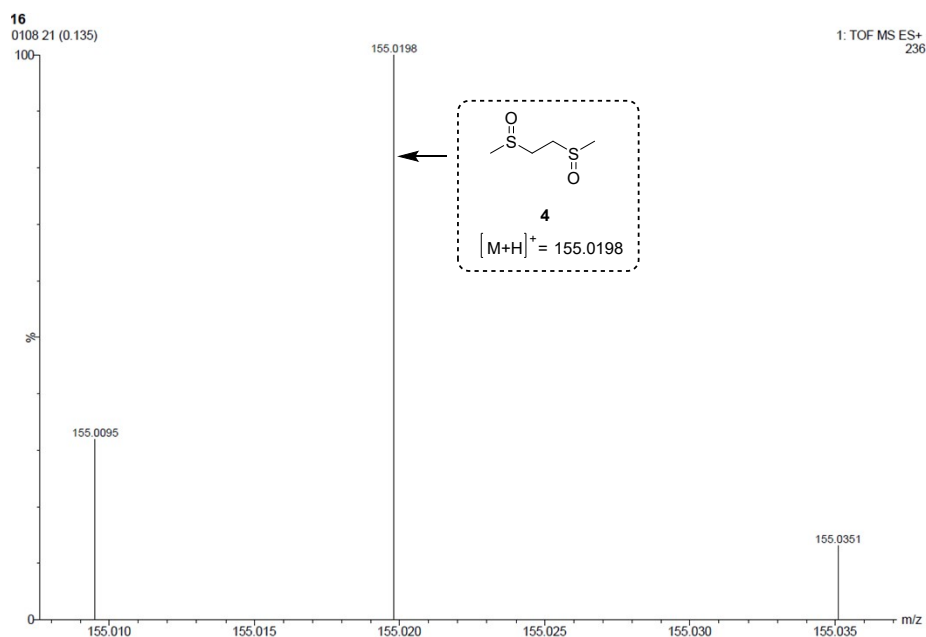

**Figure S2.** HRMS analysis of the homo-coupling product **4**.

### 3.1.3 Reaction in the presence of TEMPO

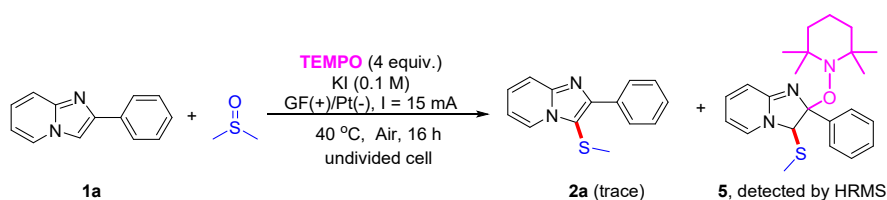

In an undivided three-necked flask (25 mL), 2-phenylimidazo[1,2-*a*]pyridine (**1a**, 97.1mg, 0.5 mmol), KI (166.0 mg, 1.0 mmol), TEMPO (312.5 mg, 2.0 mmol) and DMSO (10 mL) were continuously added. The flask was equipped with a graphite felt electrode as the anode and a platinum plate electrode (10 mm × 10 mm) as the cathode. The reaction mixture was stirred and electrolyzed at a constant current (15 mA) under air at 40 °C for 16 h. The reaction was obviously suppressed by the addition of TEMPO, and a trapping product **5** was detected through the HRMS analysis from the reaction solution (Figure S3).

**5**, HRMS (ESI-TOF)  $m/z$   $[M+H]^+$  calcd for  $C_{23}H_{32}N_3OS^+$ , 398.2261; found 398.2264.

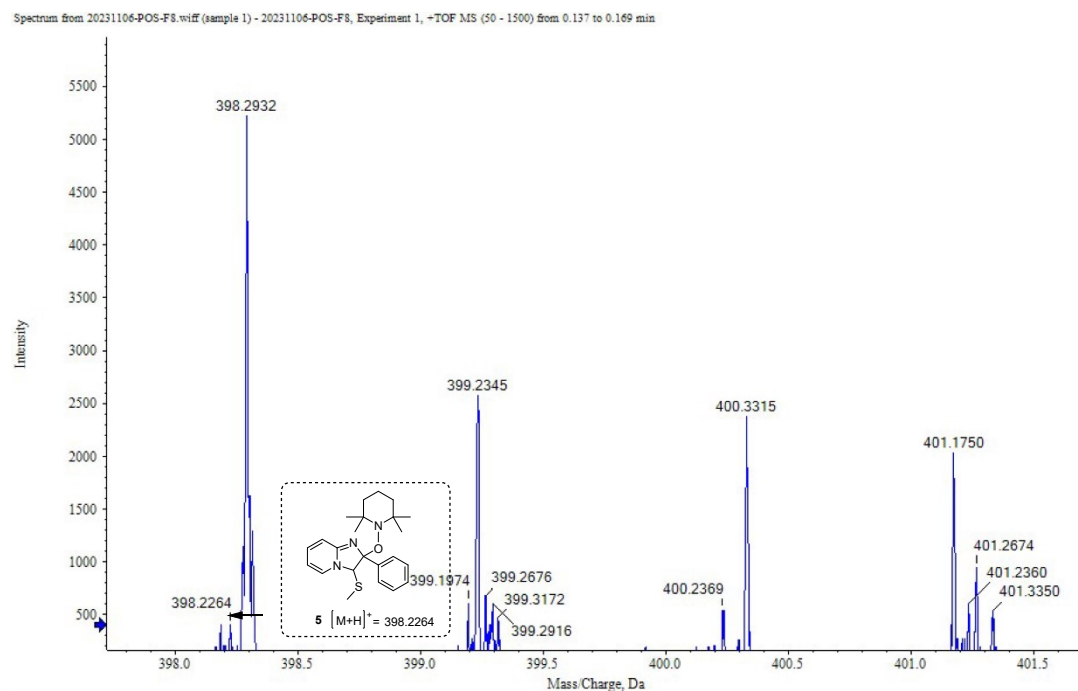

**Figure S3.** HRMS analysis of the radical-trapping product **5**.

### 3.1.4 Reaction in the presence of 1,1-diphenylethylene

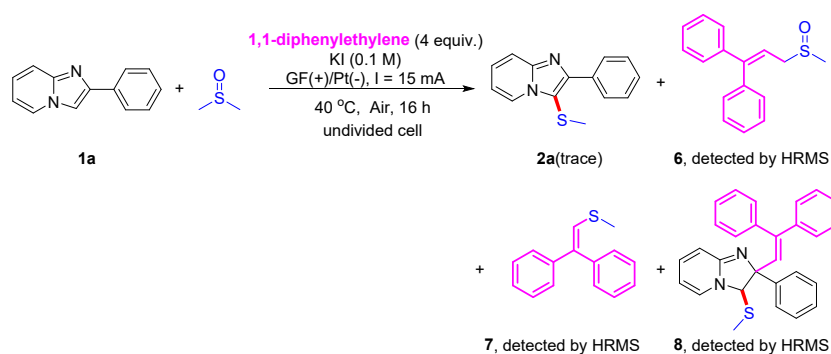

In an undivided three-necked flask (25 mL), 2-phenylimidazo[1,2-*a*]pyridine (**1a**, 97.1mg, 0.5 mmol), KI (166.0 mg, 1.0 mmol), DMSO (10 mL) and 1,1-diphenylethylene (360.5 mg, 353.1  $\mu$ L, 2.0 mmol) were continuously added. The flask was equipped with a graphite felt electrode as the anode and a platinum plate electrode (10 mm  $\times$  10 mm) as the cathode. The reaction mixture was stirred and electrolyzed at a constant current (15 mA) under air at 40 °C for 16 h. The reaction was obviously suppressed by the addition of 1,1-diphenylethylene, and trapping products **6**, **7** and **8** were observed through the HRMS analysis from the reaction solution (Figure S4-S6).

**6**, HRMS (ESI-TOF)  $m/z$   $[M+H]^+$  calcd for  $C_{16}H_{17}OS^+$ , 257.0095; found 257.0094.

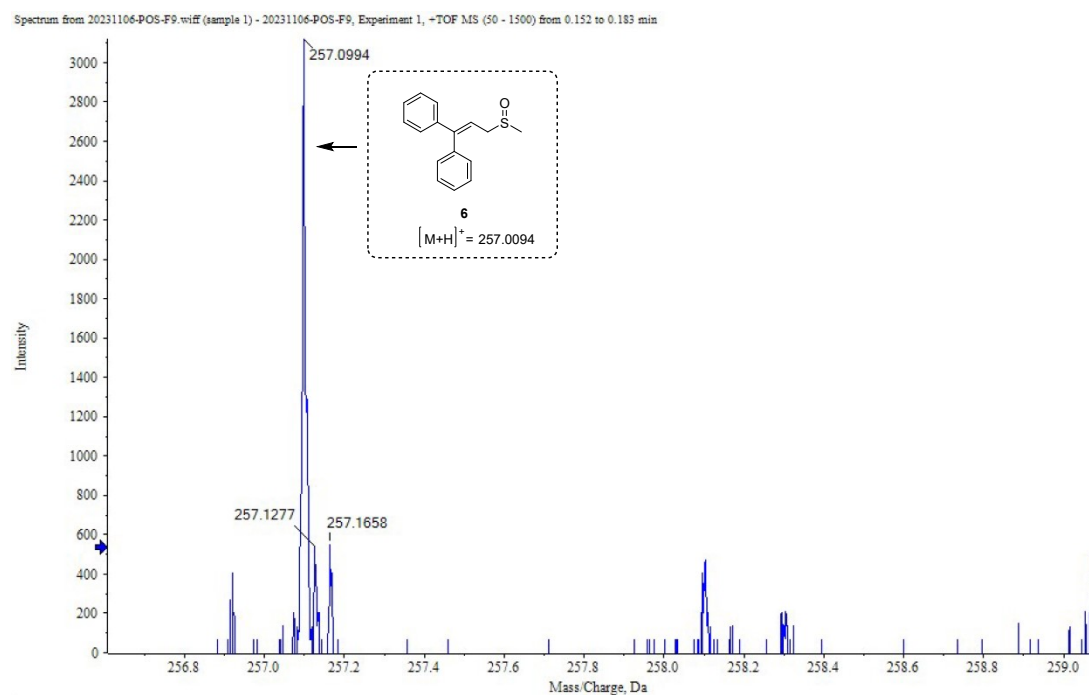

**Figure S4.** HRMS analysis of the radical-trapping product **6**.

**7**, HRMS (ESI-TOF)  $m/z$   $[M+H]^+$  calcd for  $C_{15}H_{15}S^+$ , 227.0889; found 227.0876.

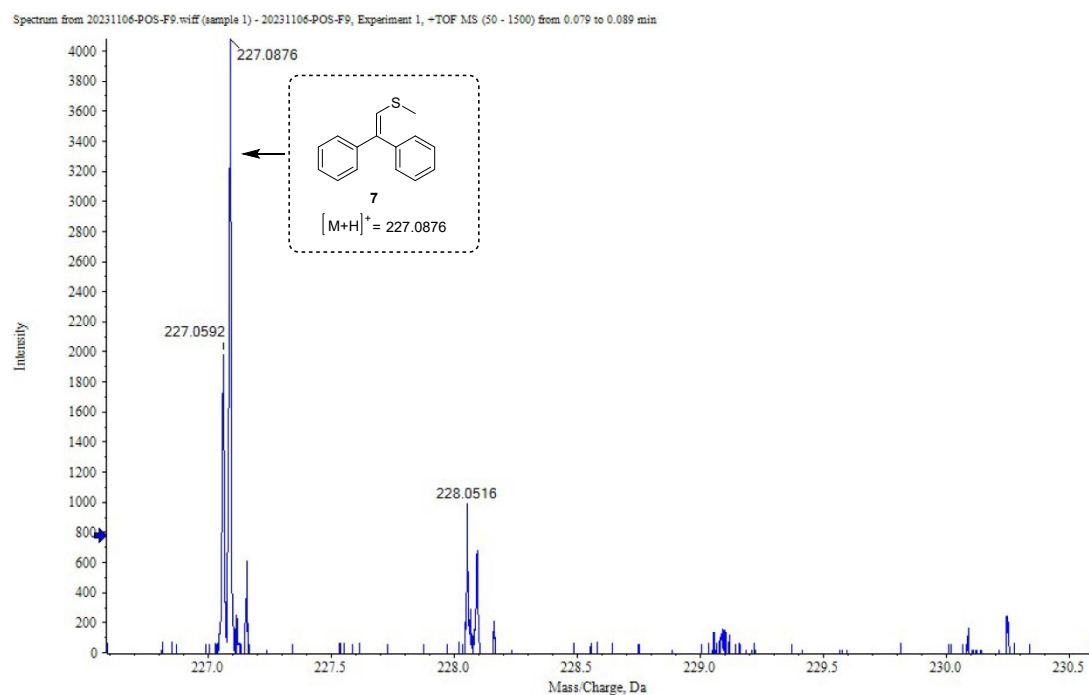

**Figure S5.** HRMS analysis of the radical-trapping product **7**.

**8**, HRMS (ESI-TOF)  $m/z$   $[M+H]^+$  calcd for  $C_{28}H_{25}N_2S^+$ , 421.1773; found 421.1772.

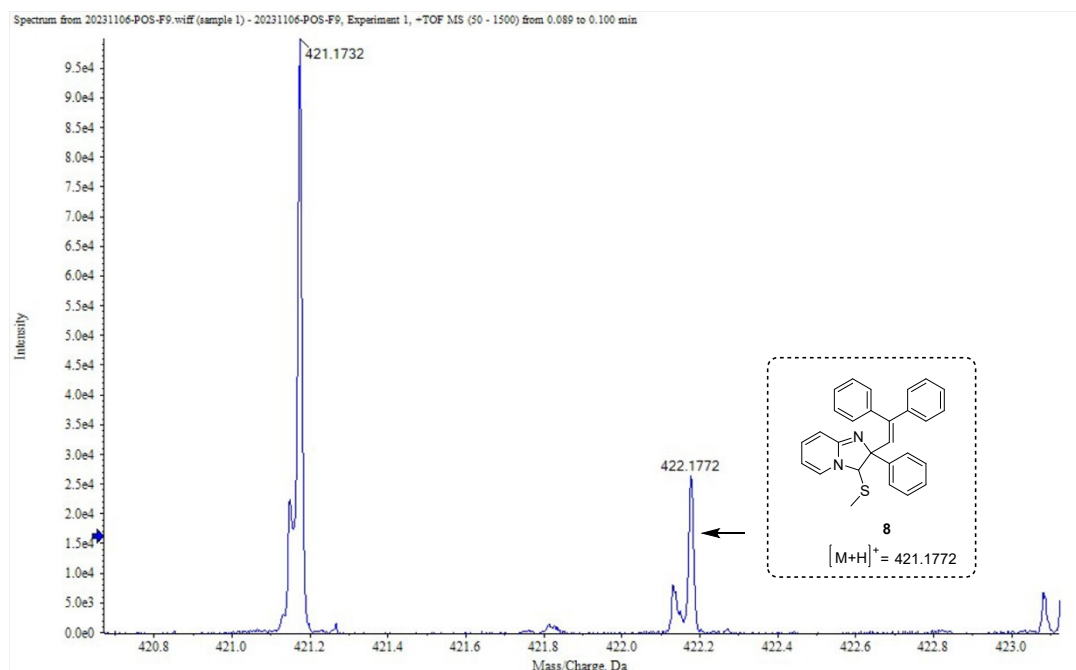

**Figure S6.** HRMS analysis of the radical-trapping product **8**.

### 3.2 Cyclic voltammetry analysis

Cyclic voltammetry was performed in a three electrodes cell in a three-necked flask at room temperature. The working electrode was a 3 mm diameter glassy carbon disc electrode, and the counter electrode was a Pt wire. The reference was silver/silver chloride electrode (Ag/AgCl) submerged in saturated aqueous KCl solution. As shown in the Figure S7, DMSO gave an oxidation peak at 1.18 V vs. Ag/AgCl in the range of 0–2.0 V, which indicated that DMSO could be oxidized under the electrochemical conditions (Figure S7).

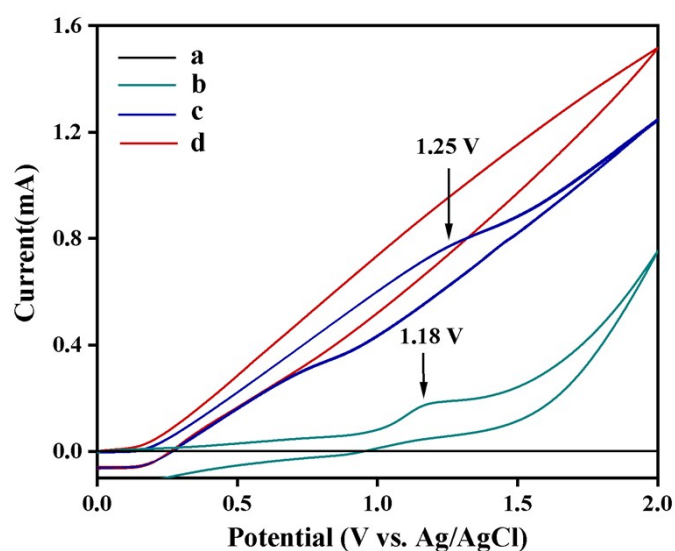

**Figure S7** CV scans (scan rate 100 mV s<sup>-1</sup>) of DMSO (10 mL) at room temperature. (a) Blank experiment (black curve); (b) <sup>t</sup>Bu<sub>4</sub>NBF<sub>4</sub> (0.02 M) (green curve); (c) KI (0.1 M) (blue curve); (d)



KI (0.1 M) and 2-phenylimidazo[1,2-*a*]pyridine (**1a**) (0.01 M) (red curve).

#### 4 Experimental data for the products 2 and 3

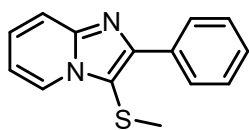

**3-(Methylthio)-2-phenylimidazo[1,2-*a*]pyridine (2a).**<sup>1</sup> The product was purified by silica gel column chromatography with petroleum ether/ethyl acetate (3:1, v/v). Brown oil (206.5 mg, 86%). <sup>1</sup>H NMR (400 MHz, CDCl<sub>3</sub>)  $\delta$  (ppm) 8.45 (d,  $J = 6.8$  Hz, 1H), 8.28 (d,  $J = 7.3$  Hz, 2H), 7.70 (d,  $J = 9.0$  Hz, 1H), 7.48 (t,  $J = 7.6$  Hz, 2H), 7.38 (t,  $J = 7.4$  Hz, 1H), 7.29–7.26 (m, 1H), 6.91 (t,  $J = 6.8$  Hz, 1H), 2.22 (s, 3H). <sup>13</sup>C NMR (100 MHz, CDCl<sub>3</sub>)  $\delta$  (ppm) 148.43, 146.10, 133.49, 128.42, 128.38, 128.30, 126.29, 124.28, 117.43, 112.97, 111.56, 18.15.

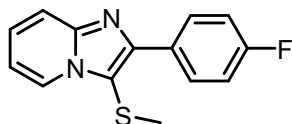

**2-(4-Fluorophenyl)-3-(methylthio)imidazo[1,2-*a*]pyridine (2b).**<sup>2</sup> The product was purified by silica gel column chromatography with petroleum ether/ethyl acetate (3:1, v/v). Yellow solid (203.9 mg, 79%), mp 88–90 °C. <sup>1</sup>H NMR (400 MHz, CDCl<sub>3</sub>)  $\delta$  (ppm) 8.40 (d,  $J = 6.8$  Hz, 1H), 8.27–8.23 (m, 2H), 7.64 (d,  $J = 9.0$  Hz, 1H), 7.25 (t,  $J = 7.9$  Hz, 1H), 7.12 (t,  $J = 8.6$  Hz, 2H), 6.89 (t,  $J = 6.8$  Hz, 1H), 2.18 (s, 3H). <sup>13</sup>C NMR (100 MHz, CDCl<sub>3</sub>)  $\delta$  (ppm) 162.85 (d,  $J = 248.0$  Hz), 147.27, 145.92, 130.04 (d,  $J = 8.1$  Hz), 129.56 (d,  $J = 3.2$  Hz), 126.52, 124.28, 117.26, 115.32 (d,  $J = 21.5$  Hz), 113.09, 111.28, 18.05.

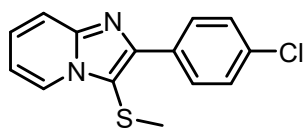

**2-(4-Chlorophenyl)-3-(methylthio)imidazo[1,2-*a*]pyridine (2c).**<sup>3</sup> The product was purified by silica gel column chromatography with petroleum ether/ethyl acetate (3:1, v/v). Yellow solid (213.7 mg, 78%), mp 102–104 °C. <sup>1</sup>H NMR (400 MHz, CDCl<sub>3</sub>)  $\delta$  (ppm) 8.43 (d,  $J = 6.9$  Hz, 1H), 8.26 (d,  $J = 8.3$  Hz, 2H), 7.64 (d,  $J = 9.0$  Hz, 1H), 7.43 (d,  $J = 8.3$  Hz, 2H), 7.29–7.25 (m, 1H), 6.91 (t,  $J = 6.8$  Hz, 1H), 2.21 (s, 3H). <sup>13</sup>C NMR (100 MHz, CDCl<sub>3</sub>)  $\delta$  (ppm) 147.46, 146.27, 134.15, 132.32, 129.44, 128.57, 126.21, 124.25, 117.57, 112.91, 111.53, 18.10.

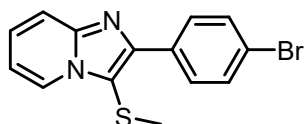

**2-(4-Bromophenyl)-3-(methylthio)imidazo[1,2-*a*]pyridine (2d).**<sup>1</sup> The product was purified by silica gel column chromatography with petroleum ether/ethyl acetate (3:1, v/v). Yellow solid (256.0 mg, 80%), mp 108–110 °C. <sup>1</sup>H NMR (400 MHz, CDCl<sub>3</sub>) δ (ppm) 8.47 (d, *J* = 6.8 Hz, 1H), 8.22 (d, *J* = 8.2 Hz, 2H), 7.67 (d, *J* = 9.0 Hz, 1H), 7.61 (d, *J* = 8.2 Hz, 2H), 7.33–7.29 (m, 1H), 6.96 (t, *J* = 6.8 Hz, 1H), 2.26 (s, 3H). <sup>13</sup>C NMR (100 MHz, CDCl<sub>3</sub>) δ (ppm) 147.57, 146.33, 132.78, 131.55, 129.75, 126.24, 124.28, 122.54, 117.65, 112.94, 111.59, 18.14.

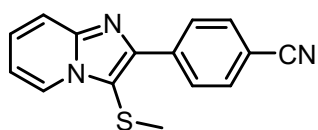

**4-(3-(Methylthio)imidazo[1,2-*a*]pyridin-2-yl)benzonitrile (2e).**<sup>4</sup> The product was purified by silica gel column chromatography with petroleum ether/ethyl acetate (3:1, v/v). Yellow solid (206.8 mg, 78%), mp 143–145 °C. <sup>1</sup>H NMR (400 MHz, CDCl<sub>3</sub>) δ (ppm) 8.53–8.48 (m, 3H), 7.80–7.76 (m, 2H), 7.71 (dt, *J* = 8.8, 1.2 Hz, 1H), 7.39–7.35 (m, 1H), 7.02 (td, *J* = 6.8, 1.2 Hz, 1H), 2.30 (s, 3H). <sup>13</sup>C NMR (100 MHz, CDCl<sub>3</sub>) δ (ppm) 146.47, 146.35, 138.29, 132.22, 128.54, 126.76, 124.37, 119.08, 117.91, 113.40, 112.98, 111.51, 18.20.

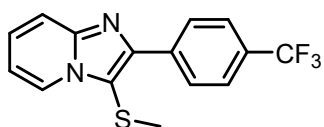

**3-(Methylthio)-2-(4-(trifluoromethyl)phenyl)imidazo[1,2-*a*]pyridine (2f).** The product was purified by silica gel column chromatography with petroleum ether/ethyl acetate (5:1, v/v). Yellow solid (219.6 mg, 72%), mp 102–104 °C. <sup>1</sup>H NMR (400 MHz, CDCl<sub>3</sub>) δ (ppm) 8.50–8.44 (m, 3H), 7.73 (d, *J* = 8.0 Hz, 2H), 7.68 (dt, *J* = 9.2, 1.2 Hz, 1H), 7.34–7.30 (m, 1H), 6.96 (td, *J* = 6.8, 1.2 Hz, 1H), 2.26 (s, 3H). <sup>13</sup>C NMR (100 MHz, CDCl<sub>3</sub>) δ (ppm) 147.09, 146.43, 137.38, 129.89 (q, *J* = 32.4 Hz), 128.34, 126.40, 125.29 (q, *J* = 3.9 Hz), 124.32, 124.31 (q, *J* = 272.1 Hz), 117.81, 113.11, 112.40, 18.14. HRMS (ESI) *m/z*: [M + H]<sup>+</sup> Calcd for C<sub>15</sub>H<sub>12</sub>F<sub>3</sub>N<sub>2</sub>S<sup>+</sup> 309.0668; Found 309.0663.

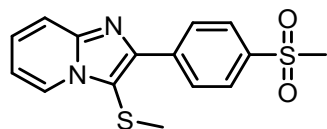

**2-(4-(Methylsulfonyl)phenyl)-3-(methylthio)imidazo[1,2-*a*]pyridine (2g).** The product was purified by silica gel column chromatography with petroleum ether/ethyl acetate (1:1, v/v). Yellow solid (235.4 mg, 74%), mp 129–131 °C. <sup>1</sup>H NMR (400 MHz, CDCl<sub>3</sub>) δ (ppm) 8.57 (d, *J* = 8.1 Hz, 2H), 8.51 (d, *J* = 6.9 Hz, 1H), 8.05 (d, *J* = 8.1 Hz, 2H), 7.70 (d, *J* = 9.0 Hz, 1H), 7.38–7.34 (m, 1H), 7.01 (t, *J* = 6.8 Hz, 1H), 3.12 (s, 3H), 2.29 (s, 3H). <sup>13</sup>C NMR (100 MHz, CDCl<sub>3</sub>) δ (ppm) 145.72, 145.19, 139.82, 138.19, 129.02, 128.01, 127.55, 124.74, 117.23, 114.19, 113.79, 44.60, 18.35. HRMS (ESI) *m/z*: [M + H]<sup>+</sup> Calcd for C<sub>15</sub>H<sub>15</sub>N<sub>2</sub>O<sub>2</sub>S<sub>2</sub><sup>+</sup> 318.0497; Found 319.0570.

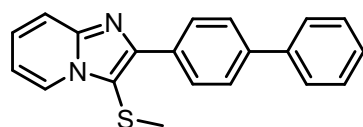

**2-([1,1'-Biphenyl]-4-yl)-3-(methylthio)imidazo[1,2-*a*]pyridine (2h).** The product was purified by silica gel column chromatography with petroleum ether/ethyl acetate (5:1, v/v). Yellow oil (240.2 mg, 76%). <sup>1</sup>H NMR (400 MHz, CDCl<sub>3</sub>) δ (ppm) 8.82 (s, 1H), 8.52–8.49 (m, 2H), 8.00–7.96 (m, 2H), 7.90–7.88 (m, 1H), 7.74 (dt, *J* = 9.2, 1.2 Hz, 1H), 7.54–7.49 (m, 2H), 7.35–7.31 (m, 1H), 6.96 (td, *J* = 6.8, 1.2 Hz, 1H), 2.29 (s, 3H). <sup>13</sup>C NMR (100 MHz, CDCl<sub>3</sub>) δ (ppm) 145.79, 143.82, 138.38, 138.24, 130.24, 126.29, 126.08, 124.88, 124.57, 124.56, 123.56, 121.74, 115.07, 110.29, 108.98, 15.68. HRMS (ESI) *m/z*: [M + H]<sup>+</sup> Calcd for C<sub>20</sub>H<sub>17</sub>N<sub>2</sub>S<sup>+</sup> 317.1107; Found 317.1104.

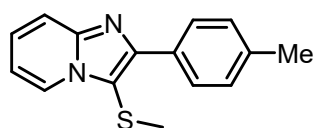

**3-(Methylthio)-2-(*p*-tolyl)imidazo[1,2-*a*]pyridine (2i).**<sup>1</sup> The product was purified by silica gel column chromatography with petroleum ether/ethyl acetate (5:1, v/v). Yellow solid (208.4 mg, 82%), mp 112–114 °C. <sup>1</sup>H NMR (400 MHz, CDCl<sub>3</sub>) δ (ppm) 8.46 (dt, *J* = 6.8, 1.2 Hz, 1H), 8.23–8.21 (m, 2H), 7.67 (dt, *J* = 9.2, 1.2 Hz, 1H), 7.32–7.25 (m, 3H), 6.90 (td, *J* = 6.8, 1.2 Hz, 1H), 2.42 (s, 3H), 2.24 (s, 3H). <sup>13</sup>C NMR (100 MHz, CDCl<sub>3</sub>) δ (ppm) 148.92, 146.29, 138.14, 131.00, 129.14, 128.15, 125.83, 124.20, 117.50, 112.62, 111.00, 21.39, 18.13.

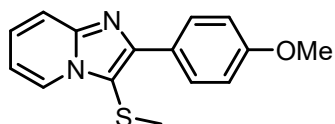

**2-(4-Methoxyphenyl)-3-(methylthio)imidazo[1,2-*a*]pyridine (2j).**<sup>2</sup> The product was purified by silica gel column chromatography with petroleum ether/ethyl acetate (3:1, v/v). Yellow oil (183.7 mg, 68%). <sup>1</sup>H NMR (400 MHz, CDCl<sub>3</sub>) δ (ppm) 8.47 (d, *J* = 6.8 Hz, 1H), 8.26 (d, *J* = 8.5 Hz, 2H), 7.70 (d, *J* = 8.9 Hz, 1H), 7.32–7.28 (m, 1H), 7.02 (d, *J* = 8.4 Hz, 2H), 6.94 (t, *J* = 6.8 Hz, 1H), 3.87 (s, 3H), 2.25 (d, *J* = 1.6 Hz, 3H). <sup>13</sup>C NMR (100 MHz, CDCl<sub>3</sub>) δ (ppm) 159.86, 148.19, 145.94, 129.59, 126.26, 125.96, 124.23, 117.15, 113.87, 112.87, 110.61, 55.31, 18.11.

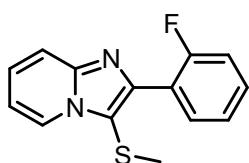

**2-(2-Fluorophenyl)-3-(methylthio)imidazo[1,2-*a*]pyridine (2k).**<sup>3</sup> The product was purified by silica gel column chromatography with petroleum ether/ethyl acetate (3:1, v/v). Yellow solid (203.9 mg, 79%), mp 90–92 °C. <sup>1</sup>H NMR (400 MHz, CDCl<sub>3</sub>) δ (ppm) 8.48 (d, *J* = 6.9 Hz, 1H), 7.76–7.70 (m, 2H), 7.46–7.41 (m, 1H), 7.38–7.34 (m, 1H), 7.30–7.26 (m, 1H), 7.25–7.20 (m, 1H), 7.01 (td, *J* = 6.8, 1.1 Hz, 1H), 2.27 (s, 3H). <sup>13</sup>C NMR (100 MHz, CDCl<sub>3</sub>) δ (ppm) 160.24 (d, *J* = 249.4 Hz), 146.46, 145.39, 132.18 (d, *J* = 3.0 Hz), 130.31 (d, *J* = 8.3 Hz), 126.14, 124.32, 124.03 (d, *J* = 3.6 Hz), 121.79 (d, *J* = 14.2 Hz), 117.86, 115.97 (d, *J* = 22.3 Hz), 113.96, 113.12, 17.89 (d, *J* = 2.5 Hz).

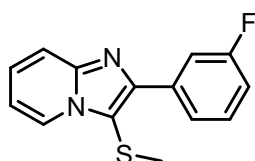

**2-(3-Fluorophenyl)-3-(methylthio)imidazo[1,2-*a*]pyridine (2l).** The product was purified by silica gel column chromatography with petroleum ether/ethyl acetate (10:1, v/v). Yellow solid (188.4 mg, 73%), mp 96–98 °C. <sup>1</sup>H NMR (400 MHz, CDCl<sub>3</sub>) δ (ppm) 8.50 (dt, *J* = 6.8, 1.2 Hz, 1H), 8.16–8.08 (m, 2H), 7.68 (d, *J* = 9.0 Hz, 1H), 7.48–7.43 (m, 1H), 7.35–7.31 (m, 1H), 7.12–7.07 (m, 1H), 6.97 (td, *J* = 6.8, 1.2 Hz, 1H), 2.28 (s, 3H). <sup>13</sup>C NMR (100 MHz, CDCl<sub>3</sub>) δ (ppm) 162.94 (d, *J* = 244.3 Hz), 147.35, 146.29, 136.05 (d, *J* = 8.2 Hz), 129.86 (d, *J* = 8.2 Hz), 126.24, 124.29, 123.81 (d, *J* = 2.8 Hz), 117.74, 115.08 (d, *J* = 21.2 Hz), 114.99 (d, *J* = 23.2 Hz), 112.97, 111.88, 18.15. HRMS (ESI) *m/z*: [M + H]<sup>+</sup> Calcd for C<sub>14</sub>H<sub>12</sub>FN<sub>2</sub>S<sup>+</sup> 259.0700; Found 259.0699.

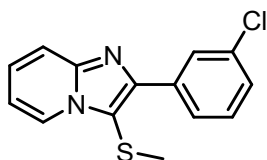

**2-(3-Chlorophenyl)-3-(methylthio)imidazo[1,2-*a*]pyridine (2m).** The product was purified by silica gel column chromatography with petroleum ether/ethyl acetate (5:1, v/v). Yellow solid (208.3 mg, 76%), mp 100–102 °C. <sup>1</sup>H NMR (400 MHz, CDCl<sub>3</sub>) δ (ppm) 8.48 (dt, *J* = 6.8, 1.2 Hz, 1H), 8.34 (t, *J* = 1.9 Hz, 1H), 8.24 (dt, *J* = 7.6, 1.6 Hz, 1H), 7.67 (dt, *J* = 8.8, 1.2 Hz, 1H), 7.42 (t, *J* = 7.8 Hz, 1H), 7.38–7.29 (m, 2H), 6.95 (td, *J* = 6.8, 1.2 Hz, 1H), 2.27 (s, 3H). <sup>13</sup>C NMR (100 MHz, CDCl<sub>3</sub>) δ (ppm) 147.22, 146.32, 135.68, 134.39, 129.64, 128.24, 128.17, 126.26, 126.25, 124.30, 117.73, 112.99, 111.92, 18.17. HRMS (ESI) *m/z*: [M + H]<sup>+</sup> Calcd for C<sub>14</sub>H<sub>12</sub>ClN<sub>2</sub>S<sup>+</sup> 275.0404; Found 275.0401.

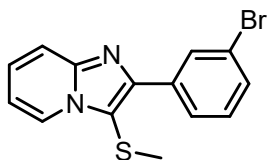

**2-(3-Bromophenyl)-3-(methylthio)imidazo[1,2-*a*]pyridine (2n).**<sup>5</sup> The product was purified by silica gel column chromatography with petroleum ether/ethyl acetate (5:1, v/v). Yellow solid (222.6 mg, 70%), mp 103–105 °C. <sup>1</sup>H NMR (400 MHz, CDCl<sub>3</sub>) δ (ppm) 8.51–8.49 (m, 2H), 8.30–8.27 (m, 1H), 7.70 (d, *J* = 9.0 Hz, 1H), 7.53 (dt, *J* = 7.6, 1.6 Hz, 1H), 7.38–7.32 (m, 2H), 6.98 (td, *J* = 6.8, 1.1 Hz, 1H), 2.28 (s, 3H). <sup>13</sup>C NMR (100 MHz, CDCl<sub>3</sub>) δ (ppm) 147.03, 146.27, 135.83, 131.21, 131.09, 129.92, 126.71, 126.37, 124.32, 122.62, 117.71, 113.07, 111.99, 18.19.

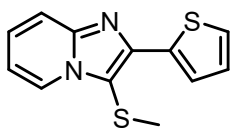

**3-(Methylthio)-2-(thiophen-2-yl)imidazo[1,2-*a*]pyridine (2o).**<sup>4</sup> The product was purified by silica gel column chromatography with petroleum ether/ethyl acetate (5:1, v/v). Yellow oil (182.1 mg, 74%). <sup>1</sup>H NMR (400 MHz, CDCl<sub>3</sub>) δ (ppm) 8.43 (dt, *J* = 6.8, 1.2 Hz, 1H), 8.07 (dd, *J* = 3.6, 1.2 Hz, 1H), 7.64 (d, *J* = 9.1 Hz, 1H), 7.40 (dd, *J* = 5.2, 1.2 Hz, 1H), 7.30–7.26 (m, 1H), 7.16 (dd, *J* = 5.2, 4.0 Hz, 1H), 6.91 (td, *J* = 6.8, 1.2 Hz, 1H), 2.29 (s, 3H). <sup>13</sup>C NMR (100 MHz, CDCl<sub>3</sub>) δ (ppm) 146.39, 144.61, 136.71, 127.66, 126.44, 126.24, 126.20, 124.15, 117.31, 112.82, 110.26, 17.84.

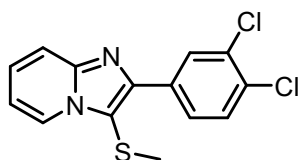

**2-(3,4-Dichlorophenyl)-3-(methylthio)imidazo[1,2-*a*]pyridine (2p).** The product was purified by silica gel column chromatography with petroleum ether/ethyl acetate (5:1, v/v). Yellow solid (212.5 mg, 69%), mp 85–87 °C. <sup>1</sup>H NMR (400 MHz, CDCl<sub>3</sub>) δ (ppm) 8.48–8.46 (m, 2H), 8.22 (dd, *J* = 8.4, 2.0 Hz, 1H), 7.66 (dt, *J* = 8.8, 1.2 Hz, 1H), 7.54 (d, *J* = 8.5 Hz, 1H), 7.35–7.31 (m, 1H), 6.97 (td, *J* = 6.8, 1.2 Hz, 1H), 2.27 (s, 3H). <sup>13</sup>C NMR (100 MHz, CDCl<sub>3</sub>) δ (ppm) 143.79, 143.64, 131.39, 130.04, 129.61, 127.79, 127.30, 124.70, 123.92, 121.75, 115.19, 110.58, 109.46, 15.60. HRMS (ESI) *m/z*: [M + H]<sup>+</sup> Calcd for C<sub>14</sub>H<sub>11</sub>Cl<sub>2</sub>N<sub>2</sub>S<sup>+</sup> 309.0015; Found 309.0008.

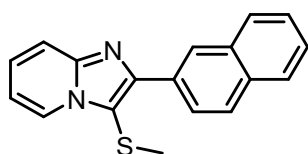

**3-(Methylthio)-2-(naphthalen-2-yl)imidazo[1,2-*a*]pyridine (2q).**<sup>4</sup> The product was purified by silica gel column chromatography with petroleum ether/ethyl acetate (5:1, v/v). Yellow oil (220.5 mg, 76%). <sup>1</sup>H NMR (400 MHz, CDCl<sub>3</sub>) δ (ppm) 8.82 (s, 1H), 8.52–8.49 (m, 2H), 8.00–7.96 (m, 2H), 7.90–7.88 (m, 1H), 7.74 (dt, *J* = 9.2, 1.2 Hz, 1H), 7.54–7.49 (m, 2H), 7.35–7.31 (m, 1H), 6.96 (td, *J* = 6.8, 1.2 Hz, 1H), 2.29 (s, 3H). <sup>13</sup>C NMR (100 MHz, CDCl<sub>3</sub>) δ (ppm) 148.47, 146.32, 133.46, 133.25, 131.12, 128.67, 127.94, 127.66, 127.62, 126.33, 126.27, 126.13, 125.94, 124.32, 117.53, 112.93, 111.90, 18.26.

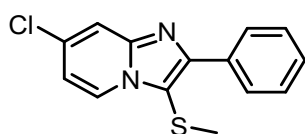

**7-Chloro-3-(methylthio)-2-phenylimidazo[1,2-*a*]pyridine (2r).** The product was purified by silica gel column chromatography with petroleum ether/ethyl acetate (5:1, v/v). Yellow solid (197.3 mg, 72%), mp 108–110 °C. <sup>1</sup>H NMR (400 MHz, CDCl<sub>3</sub>) δ (ppm) 8.39 (d, *J* = 7.2 Hz, 1H), 8.29–8.27 (m, 2H), 7.67 (d, *J* = 2.0 Hz, 1H), 7.52–7.48 (m, 2H), 7.43–7.39 (m, 1H), 6.91 (dd, *J* = 7.2, 2.0 Hz, 1H), 2.25 (s, 3H). <sup>13</sup>C NMR (100 MHz, CDCl<sub>3</sub>) δ (ppm) 149.56, 145.97, 133.40, 132.53, 128.54, 128.47, 128.19, 124.61, 116.46, 114.32, 111.89, 18.24. HRMS (ESI) *m/z*: [M + H]<sup>+</sup> Calcd for C<sub>14</sub>H<sub>12</sub>ClN<sub>2</sub>S<sup>+</sup> 275.0405; Found 275.0399.

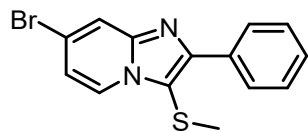

**7-Bromo-3-(methylthio)-2-phenylimidazo[1,2-*a*]pyridine (2s).** The product was purified by silica gel column chromatography with petroleum ether/ethyl acetate (10:1, v/v). Yellow solid (232.1 mg, 73%), mp 98–100 °C. <sup>1</sup>H NMR (400 MHz, CDCl<sub>3</sub>) δ (ppm) 8.37 (d, *J* = 7.2 Hz, 1H), 8.30–8.27 (m, 2H), 7.89 (d, *J* = 1.8 Hz, 1H), 7.53–7.49 (m, 2H), 7.45–7.41 (m, 1H), 7.08 (dd, *J* = 7.2, 2.0 Hz, 1H), 2.28 (s, 3H). <sup>13</sup>C NMR (100 MHz, CDCl<sub>3</sub>) δ (ppm) 149.10, 146.10, 133.05, 128.69, 128.53, 128.25, 124.65, 120.28, 119.73, 116.88, 112.14, 18.22. HRMS (ESI) *m/z*: [M + H]<sup>+</sup> Calcd for C<sub>14</sub>H<sub>12</sub>BrN<sub>2</sub>S<sup>+</sup> 318.9900; Found 318.9903.

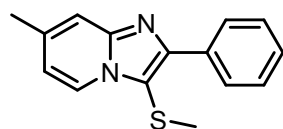

**7-Methyl-3-(methylthio)-2-phenylimidazo[1,2-*a*]pyridine (2t).**<sup>4</sup> The product was purified by silica gel column chromatography with petroleum ether/ethyl acetate (5:1, v/v). Yellow solid (203.3 mg, 80%), mp 116–118 °C. <sup>1</sup>H NMR (400 MHz, CDCl<sub>3</sub>) δ (ppm) 8.38 (d, *J* = 7.0 Hz, 1H), 8.31–8.29 (m, 2H), 7.52–7.46 (m, 3H), 7.42–7.38 (m, 1H), 6.80 (dd, *J* = 7.2, 2.0 Hz, 1H), 2.47 (s, 3H), 2.28 (s, 3H). <sup>13</sup>C NMR (100 MHz, CDCl<sub>3</sub>) δ (ppm) 148.48, 146.62, 137.28, 133.81, 128.37, 128.22, 128.20, 123.46, 116.08, 115.45, 110.70, 21.39, 18.32.

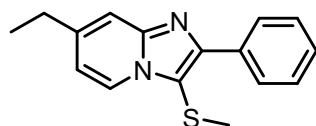

**7-Ethyl-3-(methylthio)-2-phenylimidazo[1,2-*a*]pyridine (2u).**<sup>3</sup> The product was purified by silica gel column chromatography with petroleum ether/ethyl acetate (10:1, v/v). Yellow oil (211.8 mg, 79%). <sup>1</sup>H NMR (400 MHz, CDCl<sub>3</sub>) δ (ppm) 8.38 (d, *J* = 7.0 Hz, 1H), 8.31–8.29 (m, 2H), 7.51–7.47 (m, 3H), 7.41–7.37 (m, 1H), 6.81 (dd, *J* = 6.8, 1.6 Hz, 1H), 2.75 (q, *J* = 7.5 Hz, 2H), 2.26 (s, 3H), 1.32 (t, *J* = 7.6 Hz, 3H). <sup>13</sup>C NMR (100 MHz, CDCl<sub>3</sub>) δ (ppm) 148.63, 146.81, 143.28, 133.97, 128.35, 128.19, 128.14, 123.61, 114.66, 114.40, 110.66, 28.42, 18.33, 14.44.

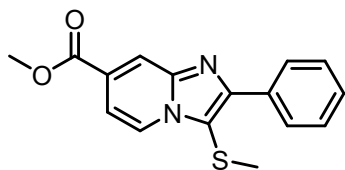

**Methyl 3-(methylthio)-2-phenylimidazo[1,2-*a*]pyridine-7-carboxylate (2v).** The product was purified by silica gel column chromatography with petroleum ether/ethyl acetate (5:1, v/v). Yellow solid (199.7 mg, 67%), mp 112–114 °C. <sup>1</sup>H NMR (400 MHz, CDCl<sub>3</sub>) δ (ppm) 8.55 (dd, *J* = 7.2, 1.2 Hz, 1H), 8.44 (t, *J* = 1.2 Hz, 1H), 8.34–8.31 (m, 2H), 7.58 (dd, *J* = 7.2, 1.6 Hz, 1H), 7.55–7.51 (m, 2H), 7.47–7.43 (m, 1H), 4.01 (s, 3H), 2.32 (s, 3H). <sup>13</sup>C NMR (100 MHz, CDCl<sub>3</sub>) δ (ppm) 165.51, 144.98, 132.94, 128.86, 128.58, 128.34, 127.58, 124.00, 119.87, 113.76, 112.27, 52.73, 18.08. HRMS (ESI) *m/z*: [M + H]<sup>+</sup> Calcd for C<sub>16</sub>H<sub>15</sub>N<sub>2</sub>O<sub>2</sub>S<sup>+</sup> 299.0849; Found 299.0831.

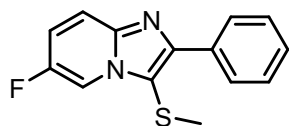

**6-Fluoro-3-(methylthio)-2-phenylimidazo[1,2-*a*]pyridine (2w).**<sup>4</sup> The product was purified by silica gel column chromatography with petroleum ether/ethyl acetate (10:1, v/v). Yellow solid (191.0 mg, 74%), mp 135–137 °C. <sup>1</sup>H NMR (400 MHz, CDCl<sub>3</sub>) δ (ppm) 8.42–8.40 (m, 1H), 8.30–8.27 (m, 2H), 7.66–7.62 (m, 1H), 7.52–7.47 (m, 2H), 7.42–7.38 (m, 1H), 7.23–7.18 (m, 1H), 2.26 (s, 3H). <sup>13</sup>C NMR (100 MHz, CDCl<sub>3</sub>) δ (ppm) 153.79 (d, *J* = 237.6 Hz), 150.02 (d, *J* = 2.4 Hz), 143.85, 133.58, 128.45, 128.44, 128.10, 118.15 (d, *J* = 8.7 Hz), 117.78 (d, *J* = 25.6 Hz), 112.91, 111.11 (d, *J* = 41.5 Hz), 18.03.

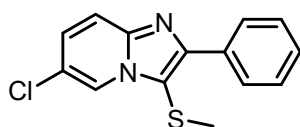

**6-Chloro-3-(methylthio)-2-phenylimidazo[1,2-*a*]pyridine (2x).**<sup>4</sup> The product was purified by silica gel column chromatography with petroleum ether/ethyl acetate (5:1, v/v). Yellow solid (194.6 mg, 71%), mp 164–166 °C. <sup>1</sup>H NMR (400 MHz, CDCl<sub>3</sub>) δ (ppm) 8.54 (dd, *J* = 2.0, 0.8 Hz, 1H), 8.31–8.29 (m, 2H), 7.64 (dd, *J* = 9.6, 0.8 Hz, 1H), 7.53–7.49 (m, 2H), 7.44–7.40 (m, 1H), 7.28 (dd, *J* = 9.2, 2.0 Hz, 1H), 2.30 (s, 3H). <sup>13</sup>C NMR (100 MHz, CDCl<sub>3</sub>) δ (ppm) 149.58, 144.60, 133.33, 128.58, 128.50, 128.18, 127.37, 122.31, 121.32, 118.01, 112.24, 18.23.



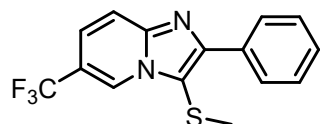

**3-(Methylthio)-2-phenyl-6-(trifluoromethyl)imidazo[1,2-*a*]pyridine (2y).**<sup>4</sup> The product was purified by silica gel column chromatography with petroleum ether/ethyl acetate (5:1, v/v). Yellow solid (215.6 mg, 70%), mp 140–142 °C. <sup>1</sup>H NMR (400 MHz, CDCl<sub>3</sub>) δ (ppm) 8.86 (s, 1H), 8.35–8.32 (m, 2H), 7.79 (d, *J* = 9.3 Hz, 1H), 7.53 (t, *J* = 7.4 Hz, 2H), 7.48–7.43 (m, 2H), 2.32 (s, 3H). <sup>13</sup>C NMR (100 MHz, CDCl<sub>3</sub>) δ (ppm) 150.45, 146.05, 133.03, 128.86, 128.56, 123.63 (q, *J* = 271.2 Hz), 123.32 (q, *J* = 5.5 Hz), 121.89 (q, *J* = 2.9 Hz), 118.30, 117.26 (q, *J* = 34.3 Hz), 113.35, 18.34.

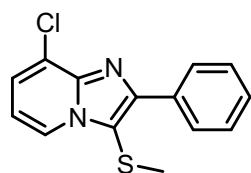

**8-Chloro-3-(methylthio)-2-phenylimidazo[1,2-*a*]pyridine (2z).**<sup>4</sup> The product was purified by silica gel column chromatography with petroleum ether/ethyl acetate (5:1, v/v). Yellow solid (205.5 mg, 75%), mp 110–112 °C. <sup>1</sup>H NMR (400 MHz, CDCl<sub>3</sub>) δ (ppm) 8.40 (dd, *J* = 6.8, 0.8 Hz, 1H), 8.34–8.32 (m, 2H), 7.52–7.48 (m, 2H), 7.41 (t, *J* = 7.3 Hz, 1H), 7.35 (dd, *J* = 7.2, 1.2 Hz, 1H), 6.86 (t, *J* = 7.1 Hz, 1H), 2.25 (s, 3H). <sup>13</sup>C NMR (100 MHz, CDCl<sub>3</sub>) δ (ppm) 149.48, 143.55, 133.39, 128.80, 128.52, 128.39, 124.85, 123.38, 123.07, 113.40, 112.30, 18.22.

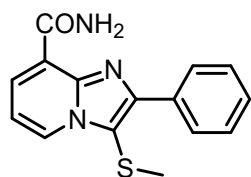

**3-(Methylthio)-2-phenylimidazo[1,2-*a*]pyridine-8-carboxamide (2aa).** The product was purified by silica gel column chromatography with petroleum ether/ethyl acetate (1:1, v/v). Yellow solid (164.2 mg, 58%), mp 182–184 °C. <sup>1</sup>H NMR (400 MHz, CDCl<sub>3</sub>) δ (ppm) 10.16 (s, 1H), 8.68 (d, *J* = 6.7 Hz, 1H), 8.37–8.33 (m, 3H), 7.56–7.51 (m, 2H), 7.48–7.44 (m, 1H), 7.15 (t, *J* = 7.0 Hz, 1H), 6.11 (s, 1H), 2.32 (s, 3H). <sup>13</sup>C NMR (100 MHz, CDCl<sub>3</sub>) δ (ppm) 164.96, 148.12, 144.35, 133.00, 129.89, 128.82, 128.54, 128.30, 127.28, 120.75, 112.62, 18.29. HRMS (ESI) *m/z*: [M + H]<sup>+</sup> Calcd for C<sub>15</sub>H<sub>14</sub>N<sub>3</sub>OS<sup>+</sup> 284.0852; Found 284.0856.

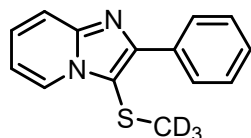

**3-((Methyl-*d*<sub>3</sub>)thio)-2-phenylimidazo[1,2-*a*]pyridine (2a-*d*<sub>3</sub>).**<sup>2</sup> The product was purified by silica gel column chromatography with petroleum ether/ethyl acetate (5:1, v/v). Yellow oil (199.3 mg, 82%). <sup>1</sup>H NMR (400 MHz, CDCl<sub>3</sub>) δ (ppm) 8.51 (d, *J* = 6.8 Hz, 1H), 8.33–8.30 (m, 2H), 7.71 (d, *J* = 9.0 Hz, 1H), 7.53–7.49 (m, 2H), 7.44–7.39 (m, 1H), 7.35–7.31 (m, 1H), 6.99–6.95 (m, 1H). <sup>13</sup>C NMR (100 MHz, CDCl<sub>3</sub>) δ (ppm) 148.69, 146.25, 133.69, 128.42, 128.34, 128.28, 126.07, 124.29, 117.61, 112.83, 112.67.

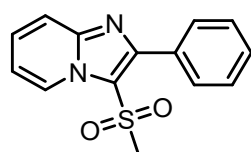

**3-(Methylsulfonyl)-2-phenylimidazo[1,2-*a*]pyridine (3).**<sup>6</sup> The product was purified by silica gel column chromatography with petroleum ether/ethyl acetate (1:1, v/v). Yellow solid (231.3 mg, 85 %), mp 185–187 °C. <sup>1</sup>H NMR (400 MHz, CDCl<sub>3</sub>) δ (ppm) 9.08 (d, *J* = 6.8 Hz, 1H), 7.83 (d, *J* = 6.8 Hz, 2H), 7.79 (d, *J* = 9.0 Hz, 1H), 7.52–7.43 (m, 4H), 7.02 (t, *J* = 6.8 Hz, 1H), 3.15 (s, 3H). <sup>13</sup>C NMR (100 MHz, CDCl<sub>3</sub>) δ (ppm) 148.86, 147.57, 132.24, 129.29, 129.24, 128.72, 127.72, 126.90, 118.33, 116.09, 113.79, 37.96.

## 5 References

- (1) C. Ravi, D. C. Mohan and S. Adimurthy, *Org. Biomol. Chem.*, 2016, **14**, 2282–2290.
- (2) S.- K. Samanta, M.- K. Bera, *Org. Biomol. Chem.*, 2019, **17**, 6441–6449.
- (3) J. Wen, C. Niu, K. Yan., X. Cheng, R. Gong, M. Li, Y. Guo, J. Yang and H. Wang, *Green Chem.*, 2020, **22**, 1129–1133.
- (4) Z. Chen, G. Cao, F. Zhang, H. Li, J. Xu, M. Miao and H. Ren, *Synlett*, 2017, **28**, 1795-1800.
- (5) D. Singh, S. Chowdhury, S. Pramanik and S. Maity, *Tetrahedron*, 2021, **88**, 132125.
- (6) L. Han, M. Huang, Y. Li, J. Zhang, Y. Zhu, J. Kim and Y. Wu, *Org. Chem. Front.*, 2021, **8**, 3110-3117.

## 6 $^1\text{H}$ and $^{13}\text{C}$ NMR spectra of the products 2 and 3

8.454  
8.437  
8.292  
8.274  
7.707  
7.685  
7.497  
7.478  
7.459  
7.399  
7.380  
7.362  
7.295  
7.285  
7.279  
7.275  
7.271  
7.255  
6.926  
6.909  
6.892

-2.223

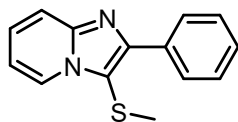

2a ( $^1\text{H}$  NMR) (400 MHz,  $\text{CDCl}_3$ )

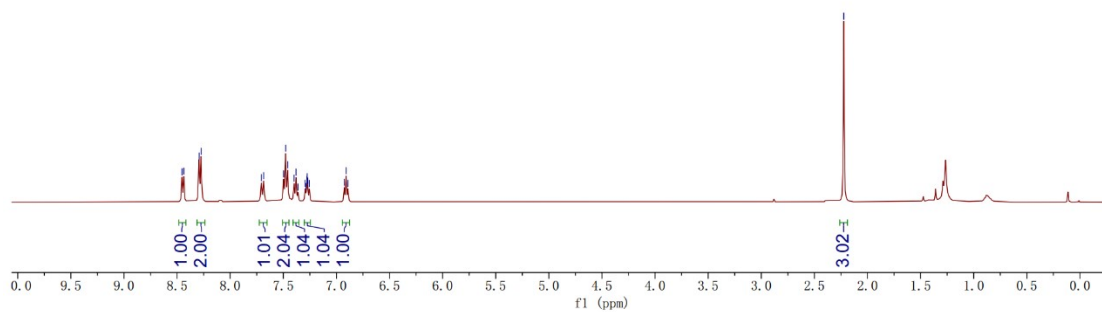

148.434  
146.102  
133.494  
128.423  
128.383  
128.304  
126.292  
124.277  
117.428  
112.966  
111.562

-18.151

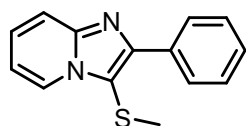

2a ( $^{13}\text{C}$  NMR) (100 MHz,  $\text{CDCl}_3$ )

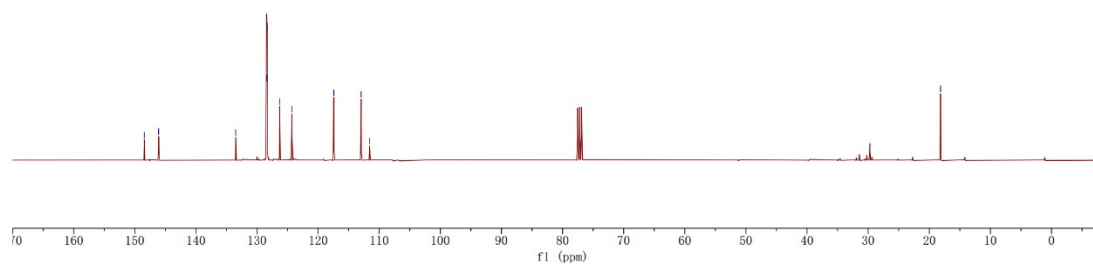

8.404  
8.387  
8.265  
8.252  
8.244  
8.230  
7.654  
7.631  
7.272  
7.252  
7.232  
7.137  
7.115  
7.094  
6.905  
6.888  
6.871

-2.179

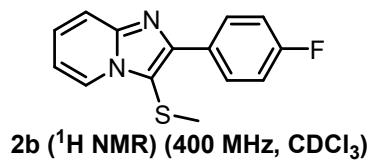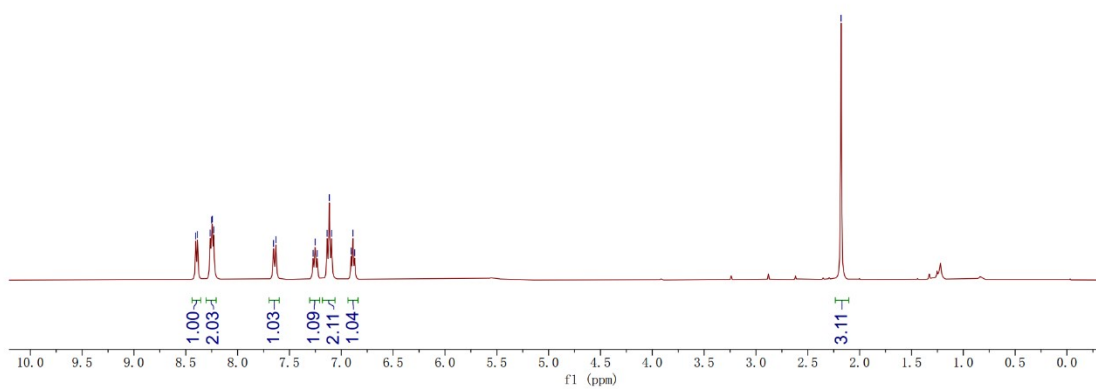

164.086  
161.621  
147.266  
145.919  
130.079  
129.998  
129.575  
129.543  
126.519  
124.280  
117.261  
115.430  
115.216  
113.088  
111.279

-18.046

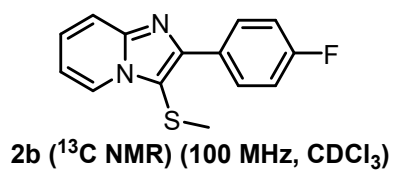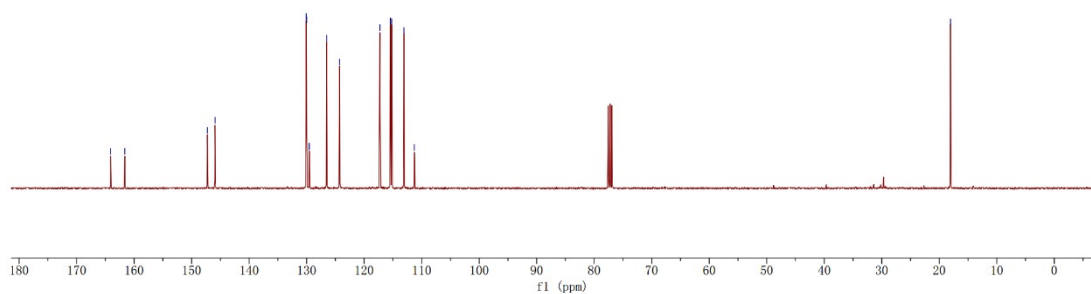

8.435  
8.418  
8.267  
8.247  
7.648  
7.625  
7.436  
7.415  
7.289  
7.274  
7.270  
7.265  
7.250  
6.922  
6.905  
6.888

-2.215

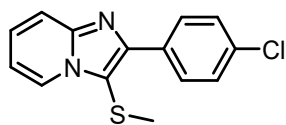

2c (<sup>1</sup>H NMR) (400 MHz, CDCl<sub>3</sub>)

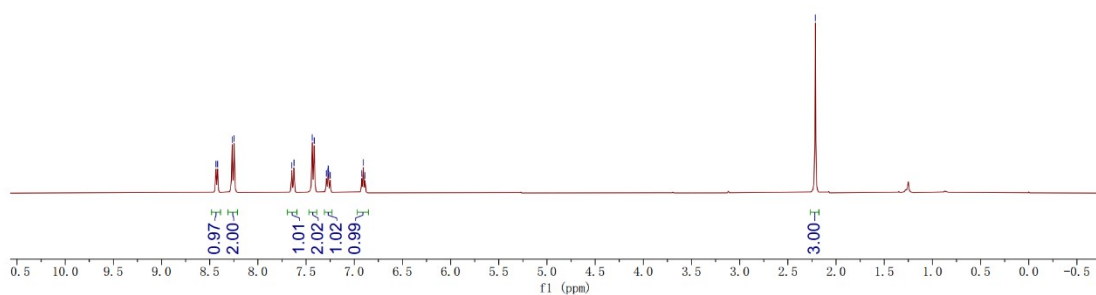

147.457  
146.273  
134.146  
132.321  
129.443  
128.566  
126.210  
124.246  
117.570  
112.911  
111.532

-18.104

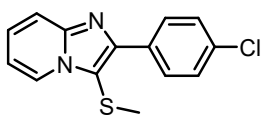

2c (<sup>13</sup>C NMR) (100 MHz, CDCl<sub>3</sub>)

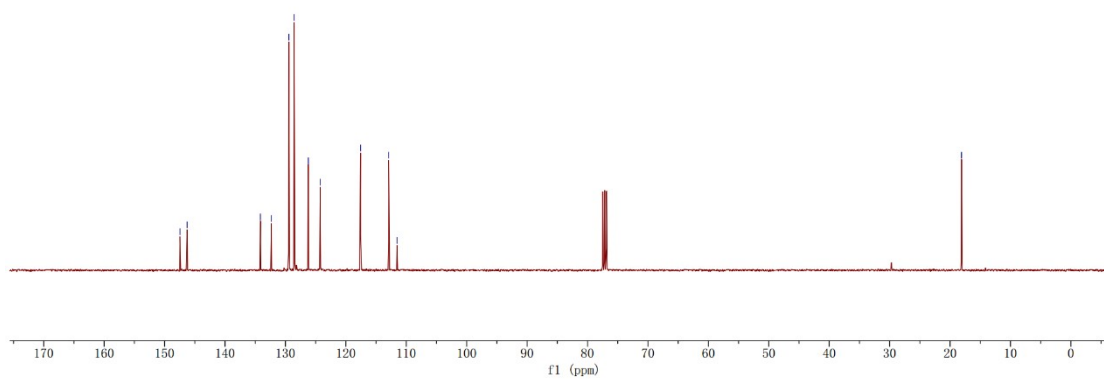

8.483  
8.466  
8.228  
8.207  
7.680  
7.658  
7.621  
7.601  
7.333  
7.318  
7.314  
7.309  
7.294  
7.285  
6.972  
6.955  
6.938

-2.256

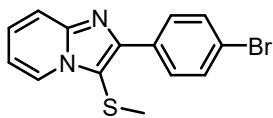

2d ( $^1\text{H}$  NMR) (400 MHz,  $\text{CDCl}_3$ )

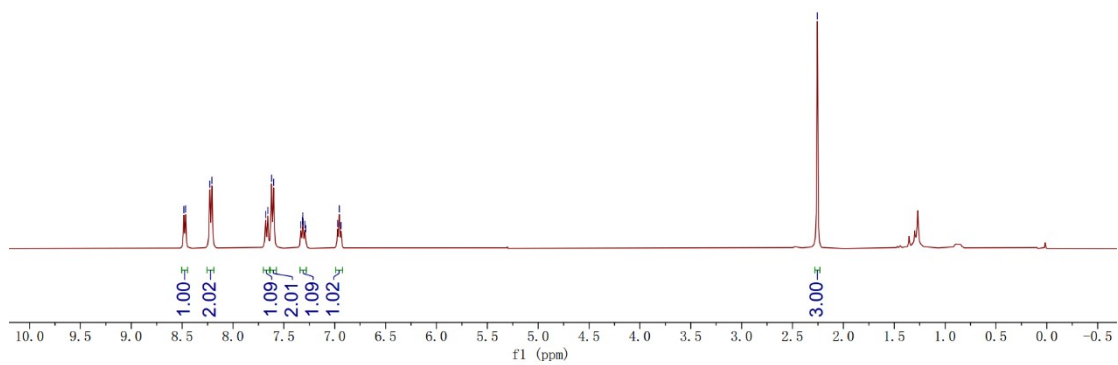

147.570  
146.334  
132.783  
131.550  
129.754  
126.236  
124.281  
122.541  
117.650  
112.944  
111.594

-18.140

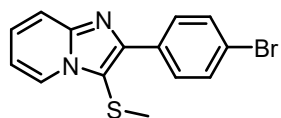

2d ( $^{13}\text{C}$  NMR) (100 MHz,  $\text{CDCl}_3$ )

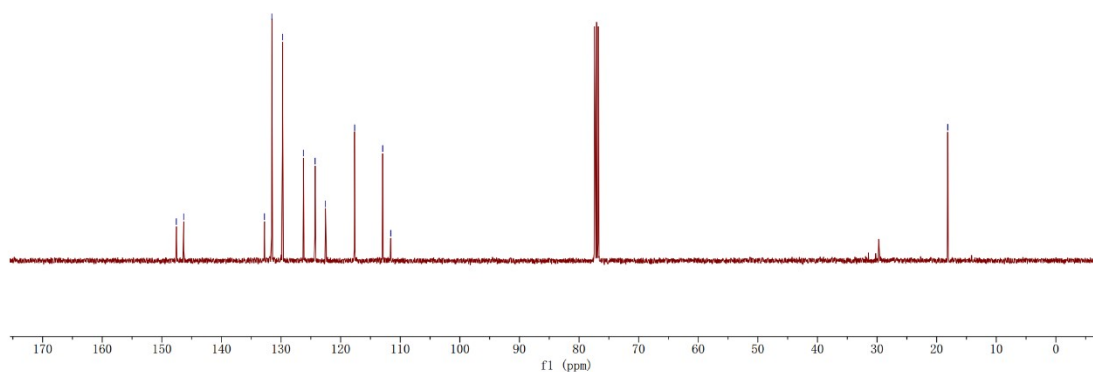

8.528  
8.525  
8.522  
8.511  
8.508  
8.503  
8.498  
8.486  
8.481  
7.790  
7.785  
7.781  
7.768  
7.764  
7.759  
7.719  
7.716  
7.714  
7.697  
7.694  
7.691  
7.393  
7.390  
7.376  
7.373  
7.371  
7.367  
7.354  
7.351  
7.035  
7.032  
7.018  
7.015  
7.001  
6.998

2.297

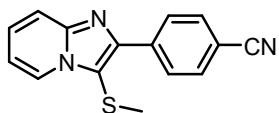

2e ( $^1\text{H}$  NMR) (400 MHz,  $\text{CDCl}_3$ )

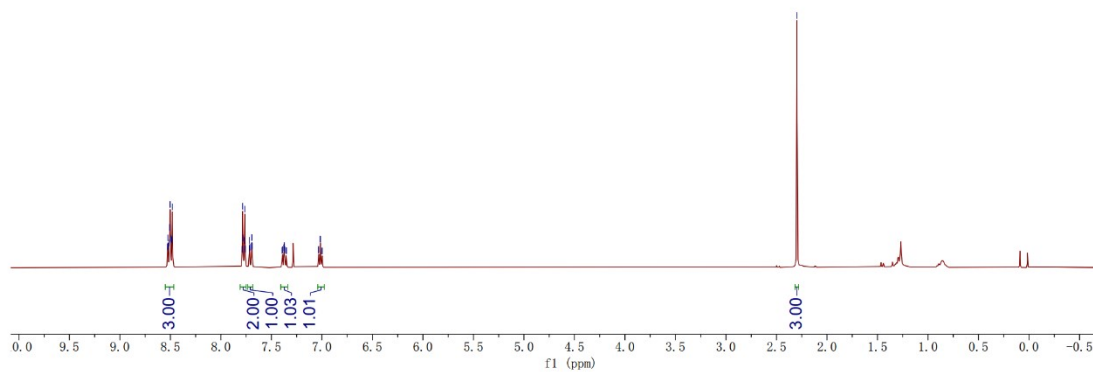

146.469  
146.349  
138.285  
132.222  
128.544  
126.758  
124.374  
119.078  
117.910  
113.395  
112.976  
111.508

18.204

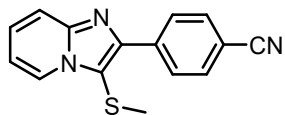

2e ( $^{13}\text{C}$  NMR) (100 MHz,  $\text{CDCl}_3$ )

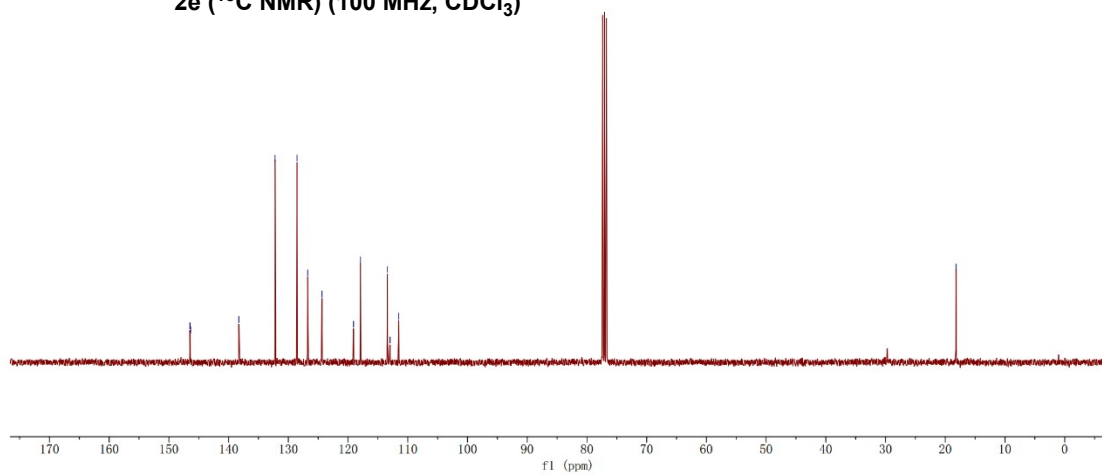

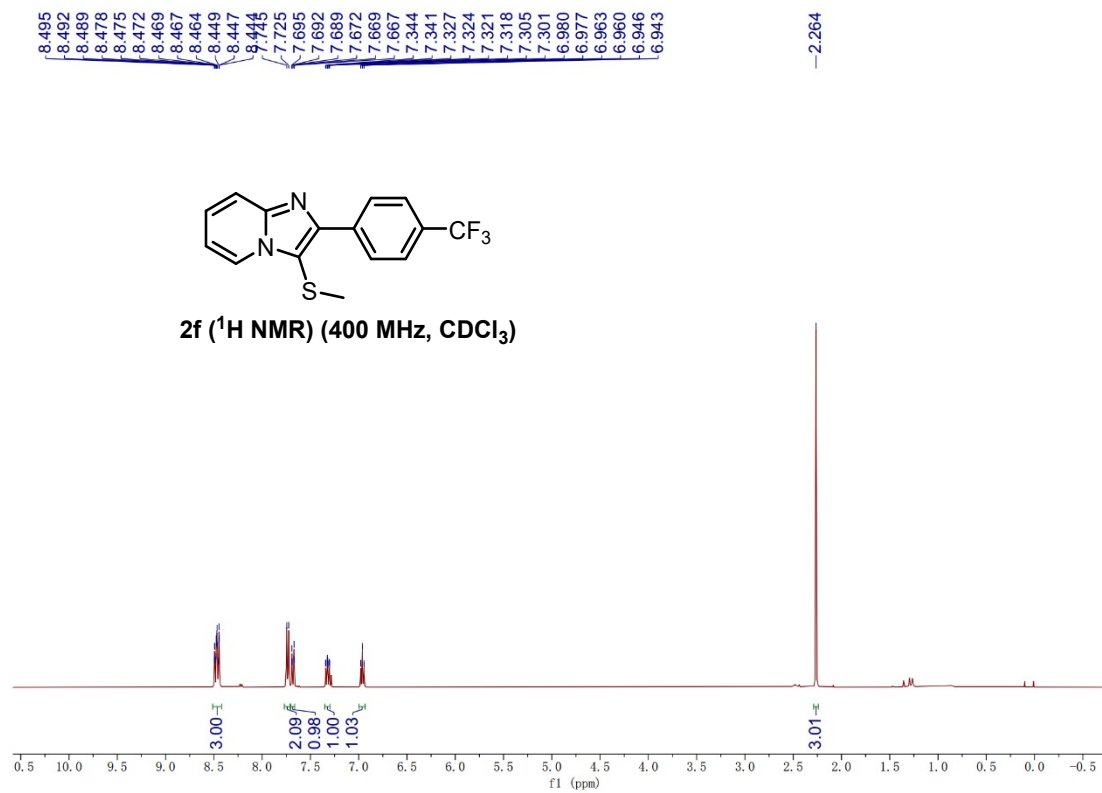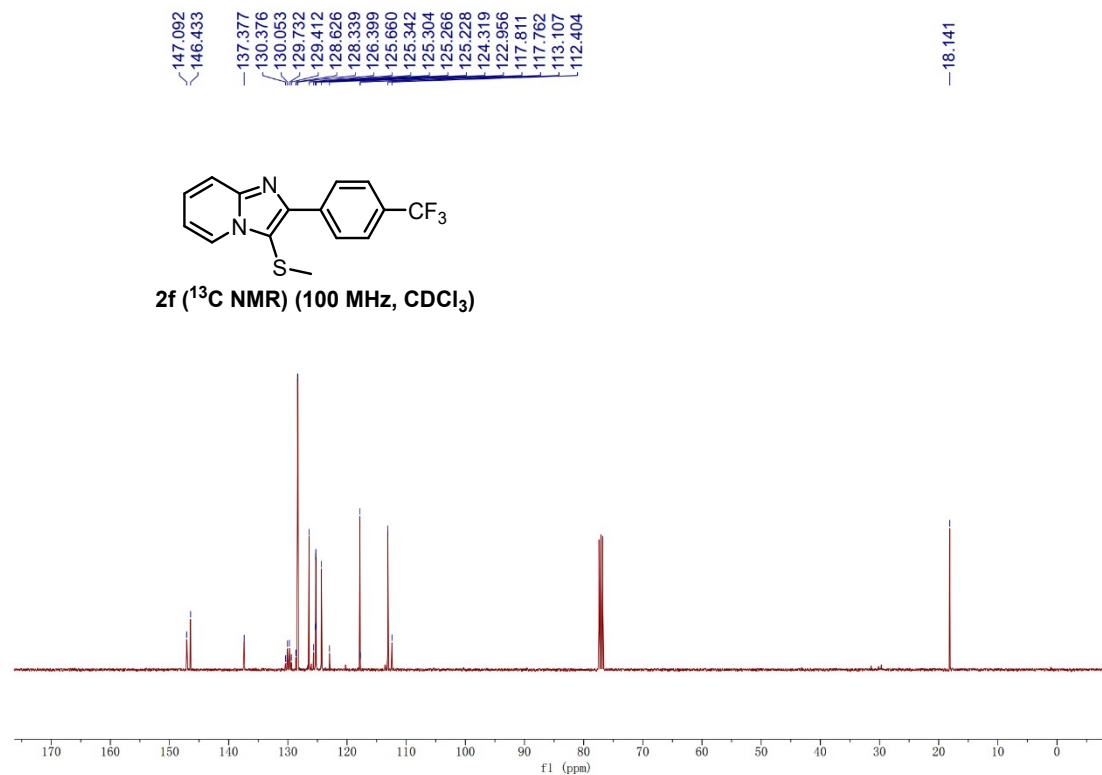



8.577  
8.556  
8.523  
8.506  
8.059  
8.039  
7.708  
7.686  
7.384  
7.381  
7.367  
7.363  
7.358  
7.344  
7.341  
7.026  
7.009  
6.992

— 3.121

— 2.293

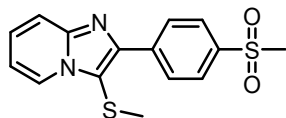

2g (<sup>1</sup>H NMR) (400 MHz, CDCl<sub>3</sub>)

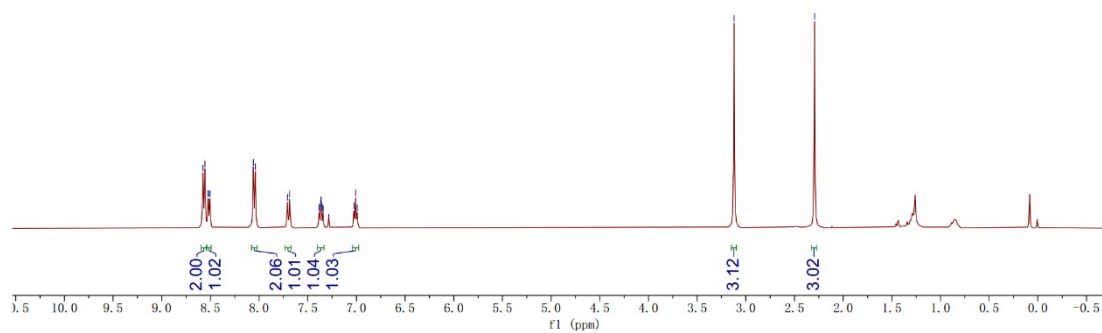

145.720  
145.193  
139.821  
138.189  
129.018  
128.007  
127.545  
124.738  
117.231  
114.191  
113.788

— 44.603

— 18.353

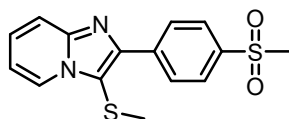

2g (<sup>13</sup>C NMR) (100 MHz, CDCl<sub>3</sub>)

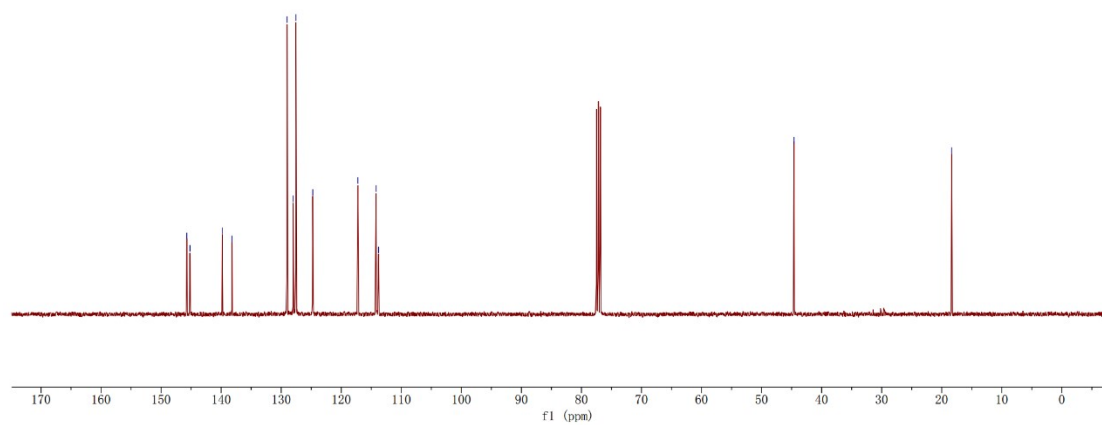

8.526  
8.523  
8.520  
8.508  
8.505  
8.503  
8.448  
8.443  
8.432  
8.427  
8.422  
7.772  
7.767  
7.756  
7.751  
7.746  
7.731  
7.728  
7.725  
7.722  
7.719  
7.714  
7.708  
7.705  
7.701  
7.698  
7.693  
7.510  
7.508  
7.494  
7.490  
7.486  
7.474  
7.470  
7.408  
7.405  
7.402  
7.387  
7.346  
7.343  
7.330  
7.326  
7.324  
7.321  
7.307  
7.304  
6.981  
6.978  
6.964  
6.961  
6.947  
6.944  
2.312

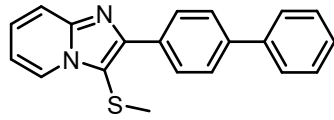

2h (<sup>1</sup>H NMR) (400 MHz, CDCl<sub>3</sub>)

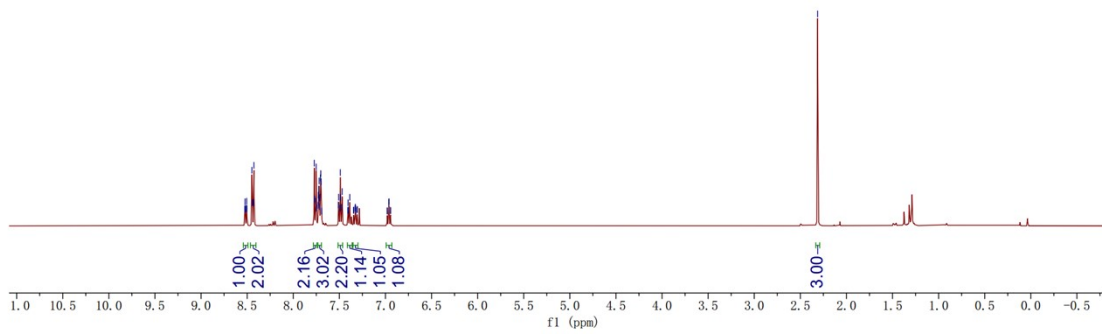

145.792  
143.819  
138.383  
138.241  
130.240  
126.287  
126.076  
124.876  
124.569  
124.555  
123.560  
121.740  
115.066  
110.290  
108.981

—15.677

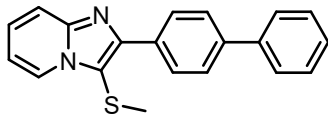

2h (<sup>13</sup>C NMR) (100 MHz, CDCl<sub>3</sub>)

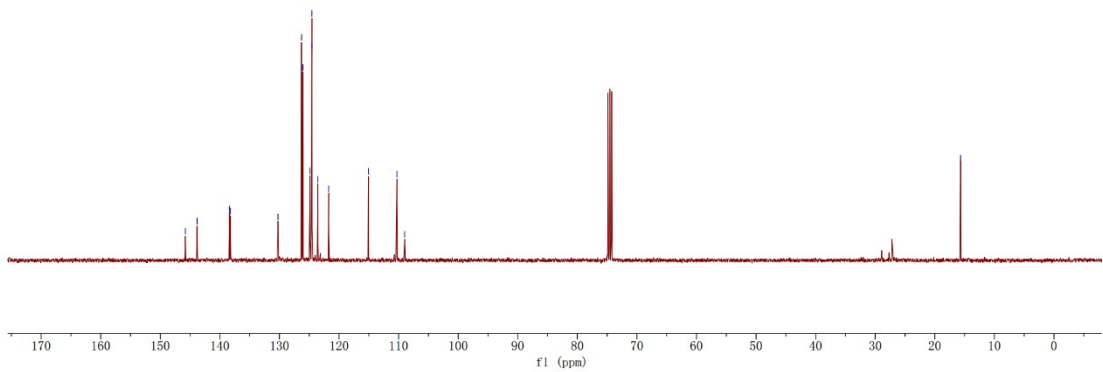

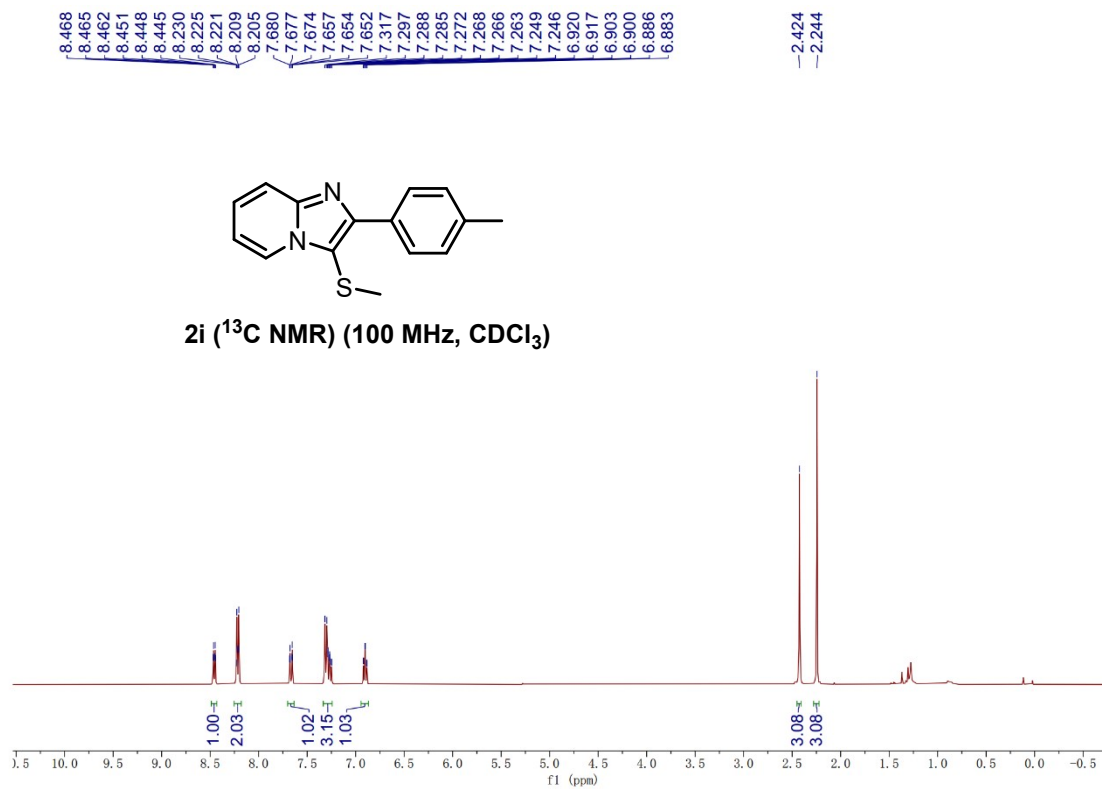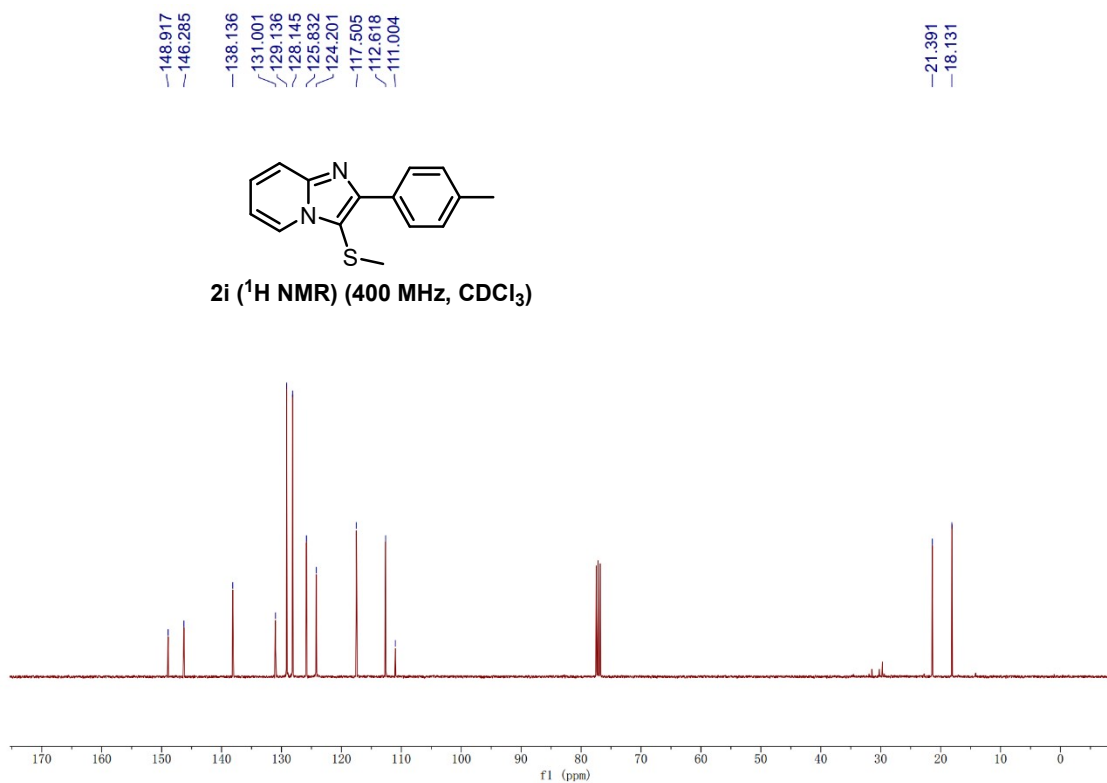

8.474  
8.457  
8.271  
8.250  
7.708  
7.686  
7.319  
7.302  
7.287  
7.285  
7.279  
7.034  
7.013  
6.954  
6.937  
6.920

3.867

2.250  
2.247

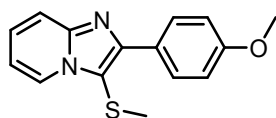

2j (<sup>1</sup>H NMR) (400 MHz, CDCl<sub>3</sub>)

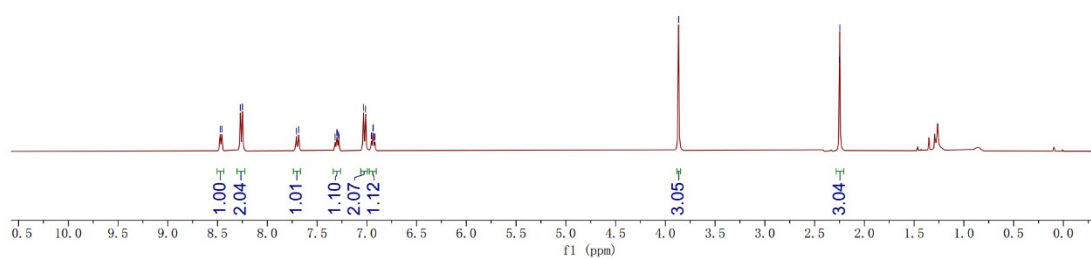

159.860  
148.194  
145.941  
129.586  
126.255  
125.955  
124.227  
117.151  
113.870  
112.868  
110.614

55.312

18.106

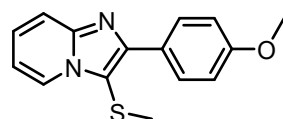

2j (<sup>13</sup>C NMR) (100 MHz, CDCl<sub>3</sub>)

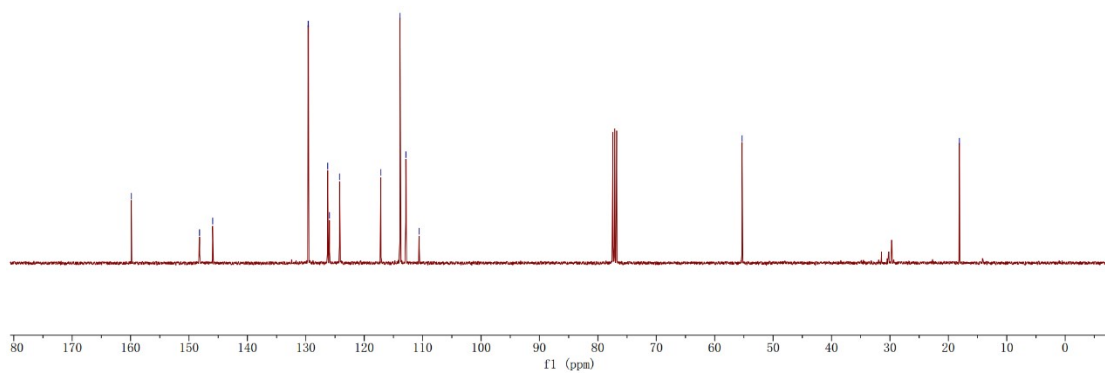

8.491  
8.474  
7.760  
7.738  
7.725  
7.720  
7.706  
7.702  
7.461  
7.457  
7.443  
7.430  
7.422  
7.418  
7.418  
7.409  
7.405  
7.379  
7.376  
7.362  
7.359  
7.340  
7.337  
7.301  
7.298  
7.285  
7.279  
7.264  
7.261  
7.250  
7.248  
7.225  
7.204  
7.201  
7.029  
7.026  
7.012  
7.009  
6.995  
6.992  
2.268

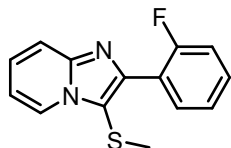

2k ( $^1\text{H}$  NMR) (400 MHz,  $\text{CDCl}_3$ )

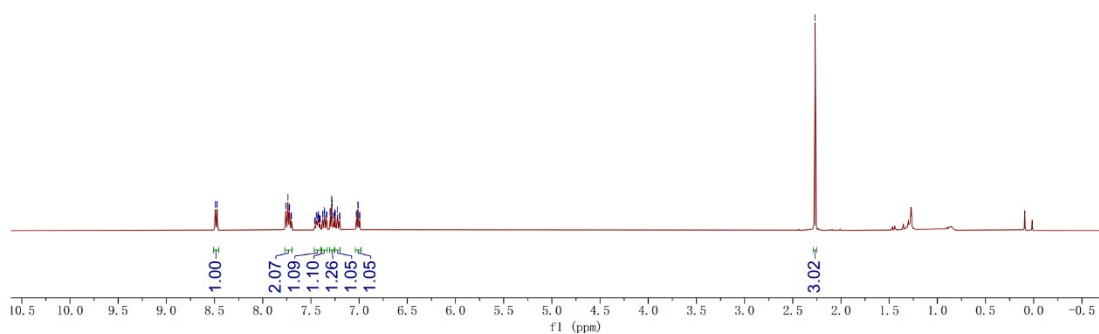

161.478  
158.999  
146.461  
145.388  
132.198  
132.168  
130.355  
130.273  
126.136  
124.324  
124.051  
124.015  
121.861  
121.720  
117.862  
116.081  
115.859  
113.959  
113.118  
17.904  
17.879

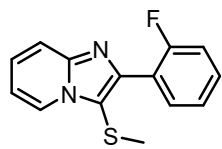

2k ( $^{13}\text{C}$  NMR) (100 MHz,  $\text{CDCl}_3$ )

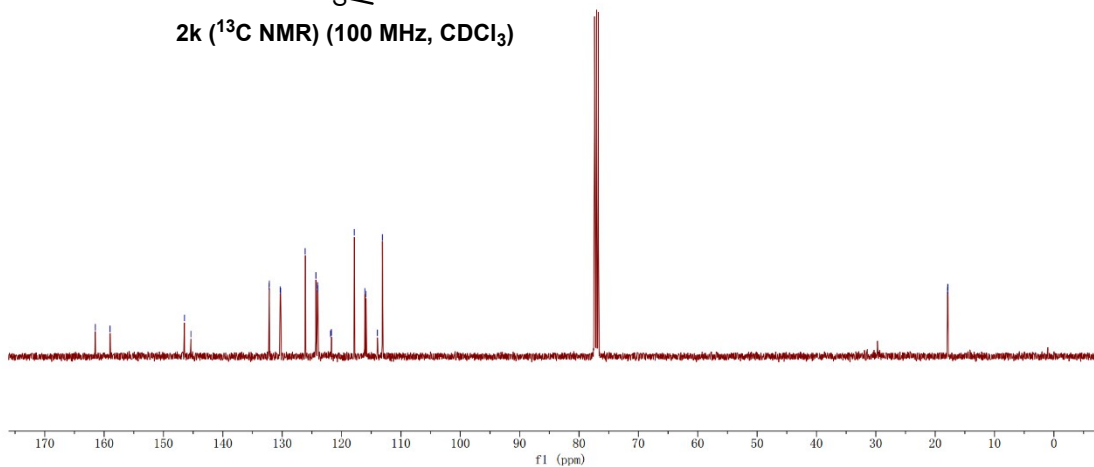

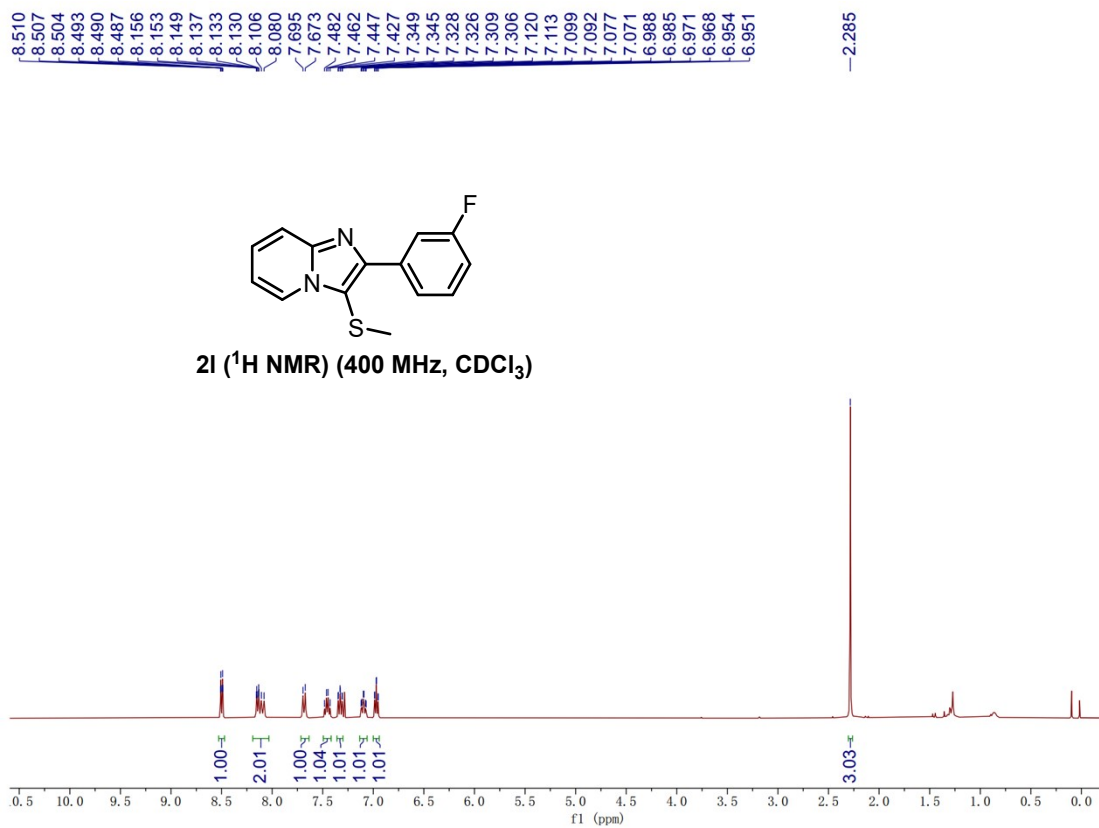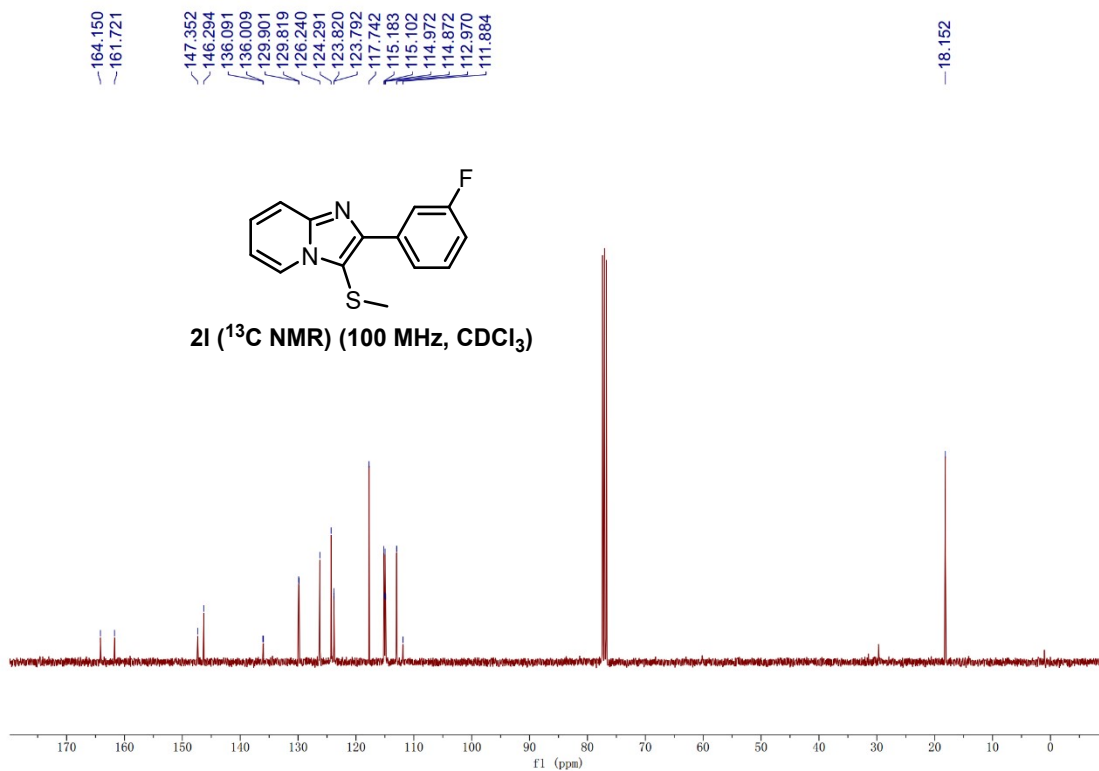

8.491  
8.488  
8.485  
8.474  
8.471  
8.468  
8.347  
8.342  
8.337  
8.249  
8.245  
8.242  
8.230  
8.226  
8.223  
7.686  
7.683  
7.680  
7.664  
7.661  
7.658  
7.435  
7.416  
7.396  
7.375  
7.372  
7.370  
7.367  
7.356  
7.352  
7.350  
7.347  
7.345  
7.335  
7.332  
7.318  
7.315  
7.313  
7.309  
7.296  
7.292  
6.970  
6.966  
6.953  
6.939  
6.936  
2.269

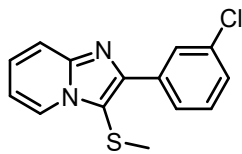

2m (<sup>1</sup>H NMR) (400 MHz, CDCl<sub>3</sub>)

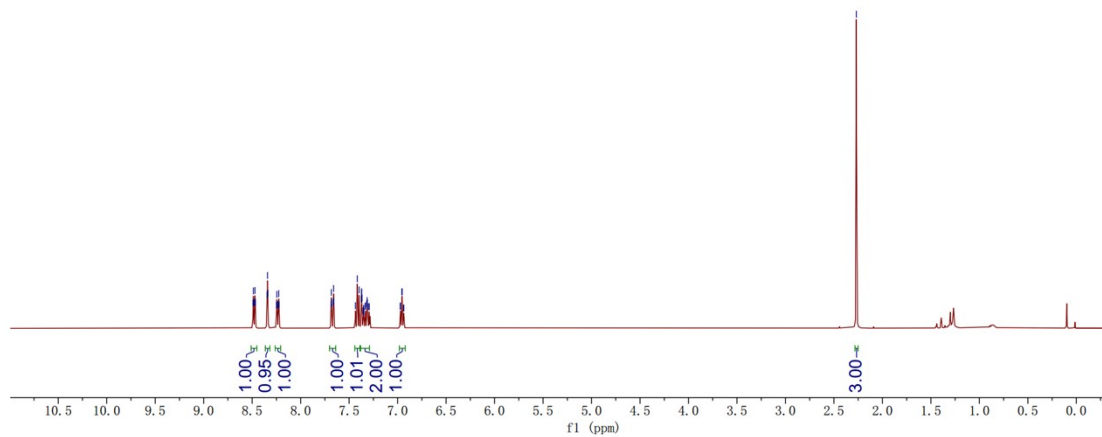

147.225  
146.323  
135.675  
134.389  
129.641  
128.245  
128.173  
126.262  
126.247  
124.297  
117.726  
112.988  
111.919

18.174

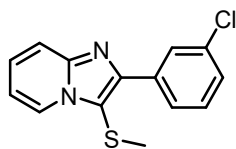

2m (<sup>13</sup>C NMR) (100 MHz, CDCl<sub>3</sub>)

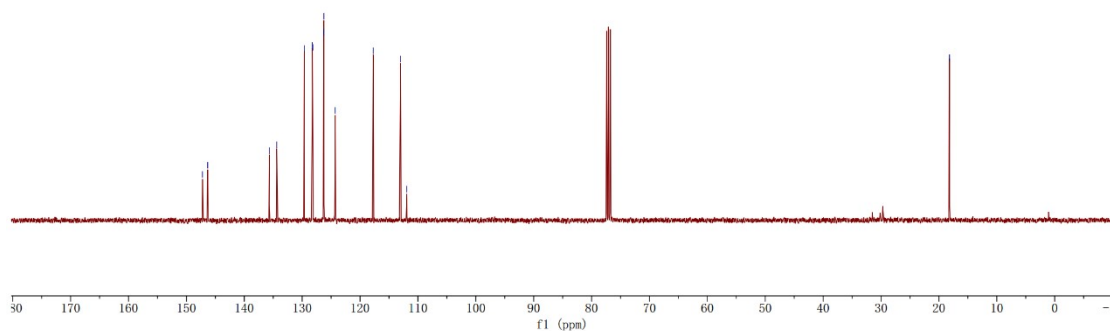

8.509  
8.506  
8.503  
8.499  
8.496  
8.492  
8.489  
8.486  
8.297  
8.281  
8.278  
8.274  
7.707  
7.685  
7.541  
7.537  
7.534  
7.522  
7.518  
7.514  
7.382  
7.363  
7.360  
7.356  
7.343  
7.339  
7.337  
7.334  
7.320  
7.317  
6.999  
6.996  
6.982  
6.979  
6.965  
6.962

-2.281

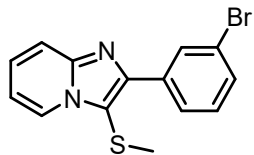

2n (<sup>1</sup>H NMR) (400 MHz, CDCl<sub>3</sub>)

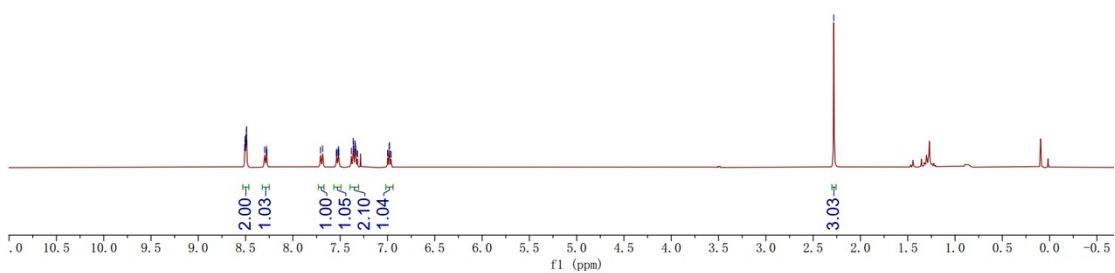

147.033  
146.268  
135.825  
131.212  
131.089  
129.924  
126.714  
126.368  
124.319  
122.616  
117.713  
113.067  
111.989

-18.188

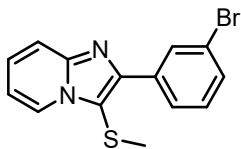

2n (<sup>13</sup>C NMR) (100 MHz, CDCl<sub>3</sub>)

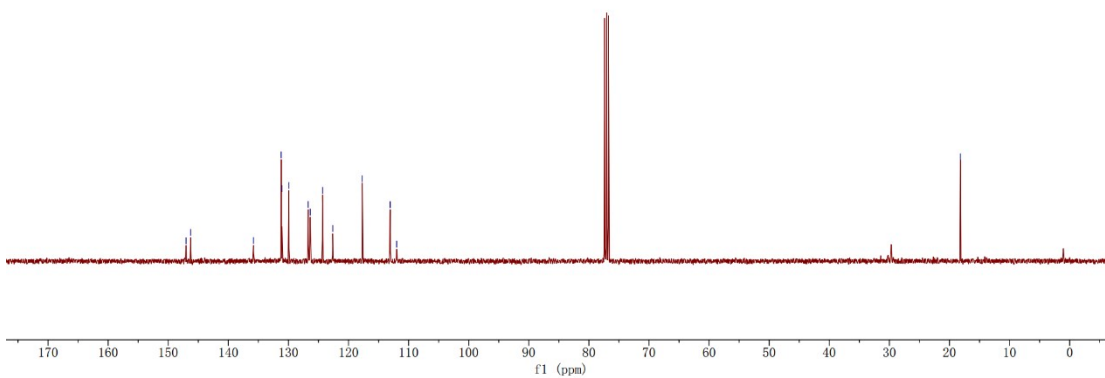



8.437  
8.434  
8.431  
8.420  
8.417  
8.414  
8.076  
8.073  
8.067  
8.064  
7.649  
7.626  
7.406  
7.403  
7.393  
7.390  
7.298  
7.295  
7.285  
7.281  
7.278  
7.276  
7.272  
7.259  
7.256  
7.173  
7.163  
7.160  
7.151  
6.930  
6.927  
6.913  
6.910  
6.896  
6.893  
-2.290

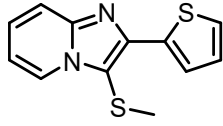

**2o (<sup>1</sup>H NMR) (400 MHz, CDCl<sub>3</sub>)**

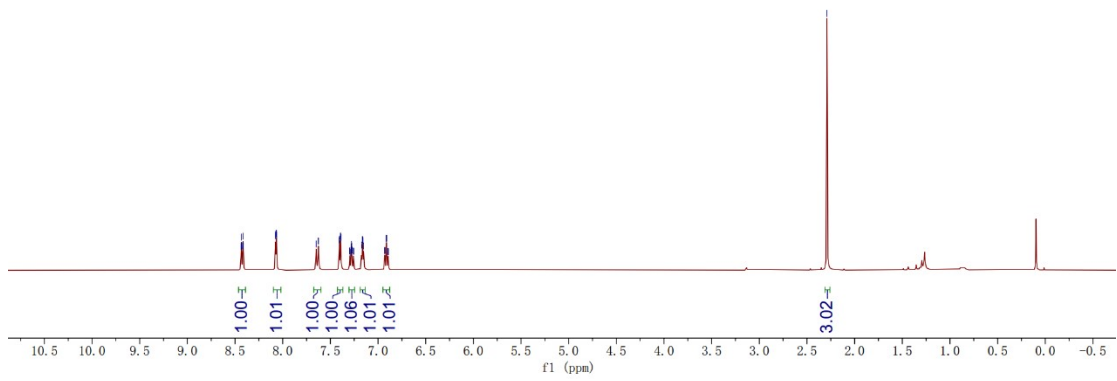

146.385  
144.611  
136.711  
127.655  
126.444  
126.244  
126.195  
124.153  
117.313  
112.823  
110.257

17.838

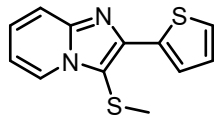

**2o (<sup>13</sup>C NMR) (100 MHz, CDCl<sub>3</sub>)**

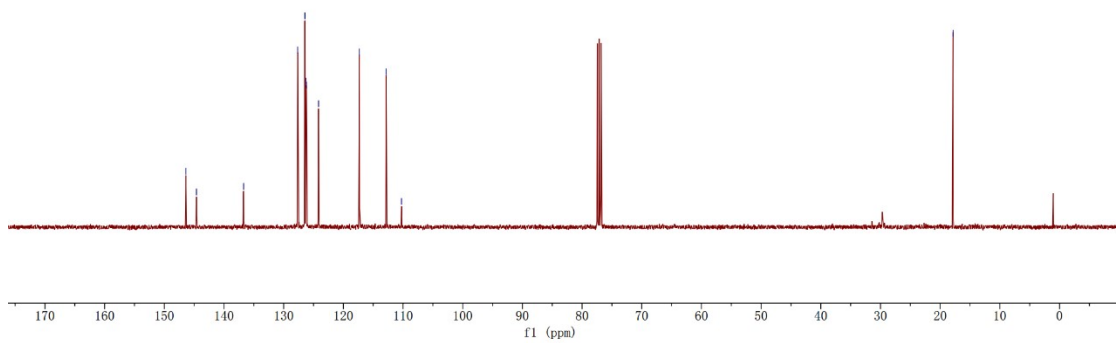

8.482  
8.479  
8.476  
8.471  
8.465  
8.459  
8.235  
8.230  
8.214  
8.209  
7.674  
7.671  
7.669  
7.652  
7.649  
7.646  
7.547  
7.526  
7.347  
7.344  
7.331  
7.327  
7.325  
7.321  
7.308  
7.305  
6.985  
6.983  
6.968  
6.965  
6.951  
6.949

-2.268

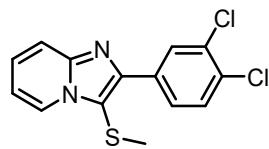

2p (<sup>1</sup>H NMR) (400 MHz, CDCl<sub>3</sub>)

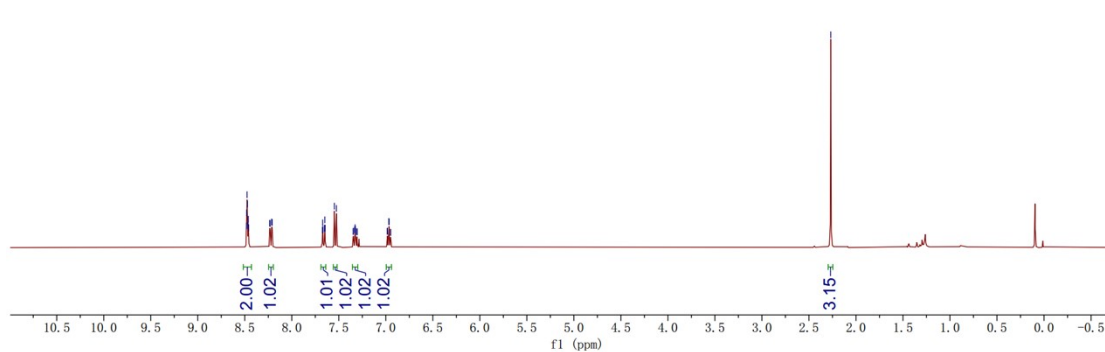

143.791  
143.639  
131.395  
130.042  
129.614  
127.793  
127.301  
124.689  
123.916  
121.752  
115.186  
110.580  
109.465

-15.604

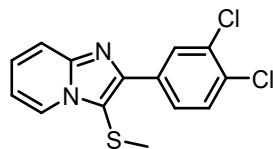

2p (<sup>13</sup>C NMR) (100 MHz, CDCl<sub>3</sub>)

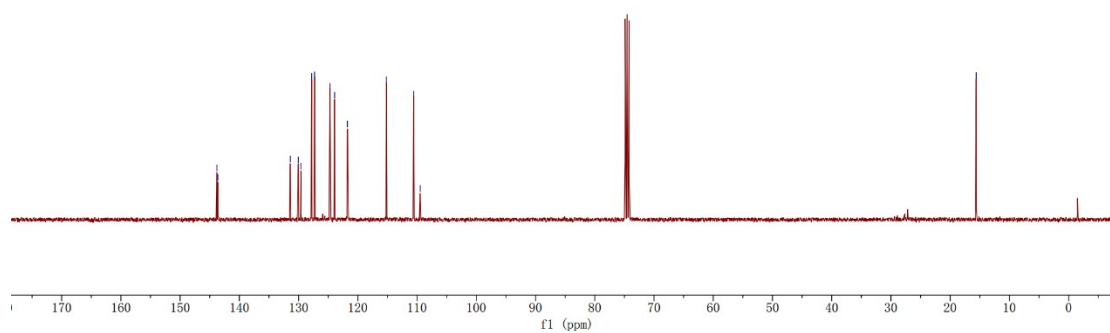

8.820  
8.523  
8.520  
8.516  
8.511  
8.506  
8.503  
8.500  
8.494  
8.490  
8.003  
7.995  
7.991  
7.978  
7.964  
7.956  
7.899  
7.893  
7.887  
7.883  
7.875  
7.753  
7.750  
7.747  
7.730  
7.727  
7.724  
7.724  
7.541  
7.536  
7.529  
7.523  
7.519  
7.516  
7.511  
7.506  
7.494  
7.494  
7.348  
7.344  
7.331  
7.328  
7.325  
7.322  
7.309  
7.305  
6.976  
6.973  
6.959  
6.956  
6.942  
6.939  
2.289

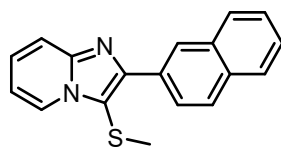

2q (<sup>1</sup>H NMR) (400 MHz, CDCl<sub>3</sub>)

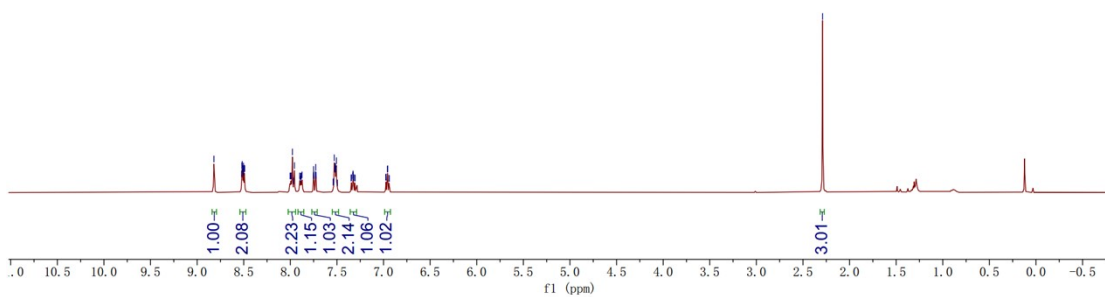

148.475  
146.324  
133.456  
133.250  
131.122  
128.669  
127.936  
127.661  
127.622  
126.327  
126.265  
126.134  
125.941  
124.322  
117.528  
112.928  
111.899

18.264

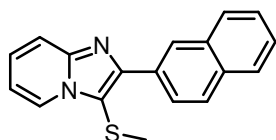

2q (<sup>13</sup>C NMR) (100 MHz, CDCl<sub>3</sub>)

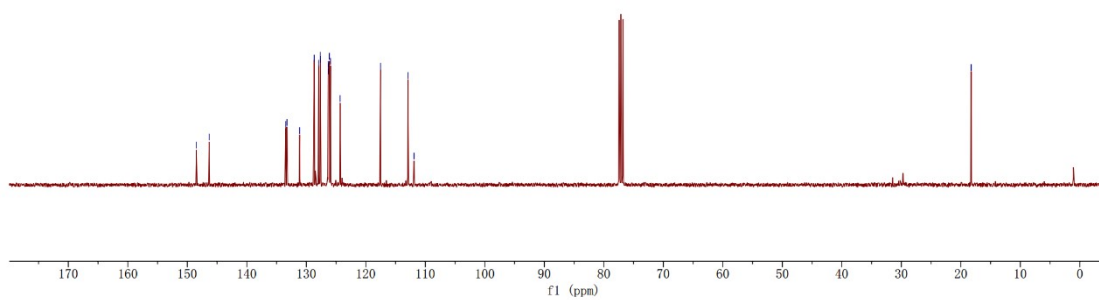

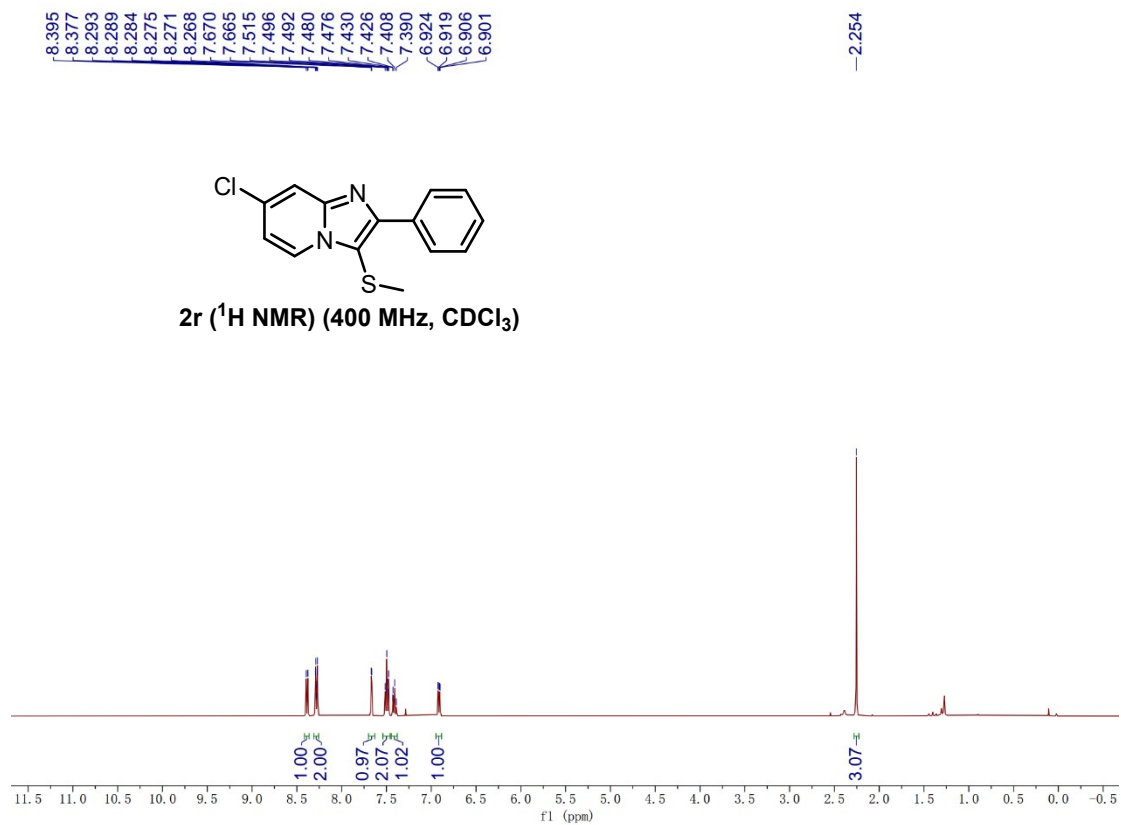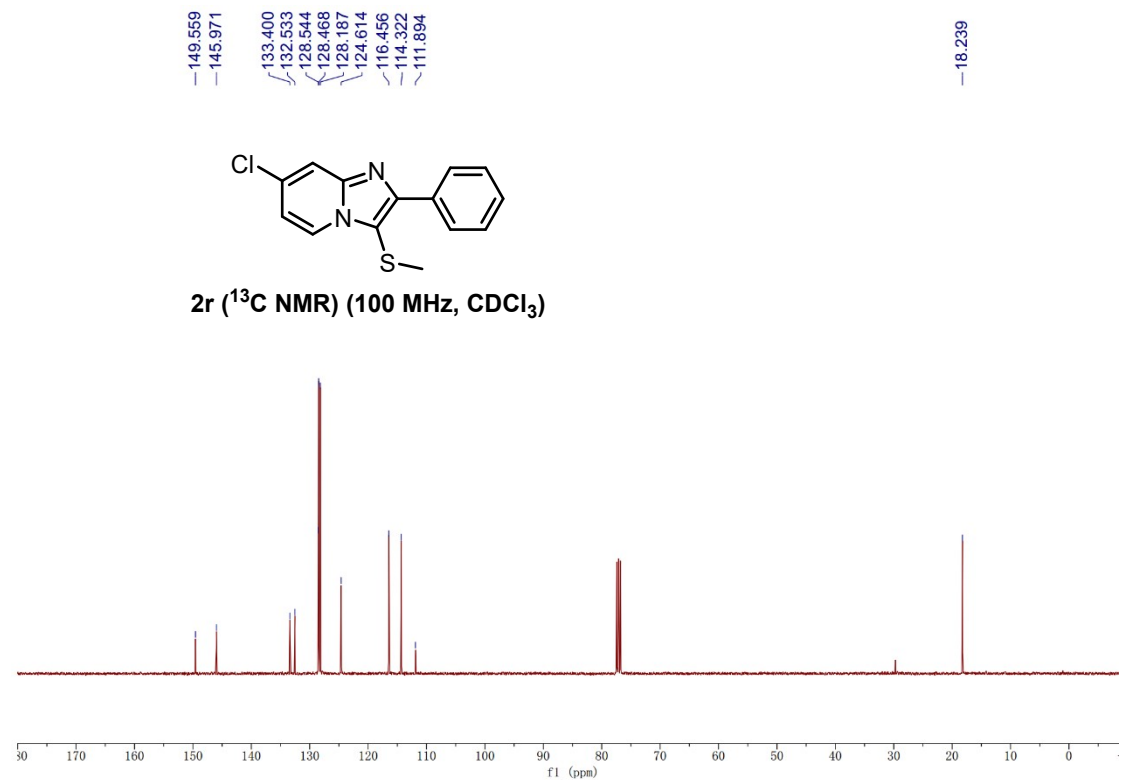

8.379  
8.361  
8.295  
8.292  
8.287  
8.278  
8.274  
8.271  
7.889  
7.885  
7.532  
7.529  
7.525  
7.511  
7.507  
7.496  
7.492  
7.449  
7.446  
7.443  
7.428  
7.409  
7.091  
7.086  
7.073  
7.068

— 2.282

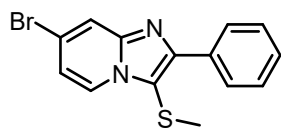

**2s** ( $^1\text{H}$  NMR) (400 MHz,  $\text{CDCl}_3$ )

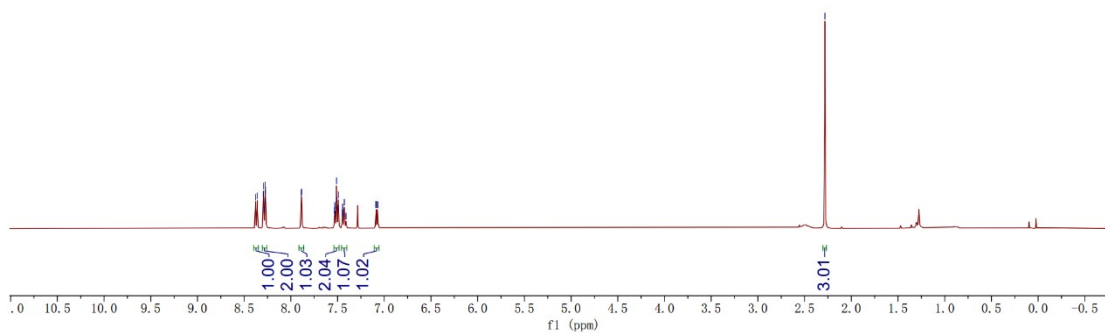

149.100  
146.098  
133.050  
128.686  
128.526  
128.253  
124.647  
120.275  
119.732  
116.883  
112.138

— 18.217

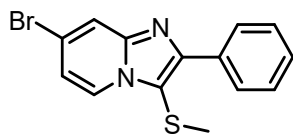

**2s** ( $^{13}\text{C}$  NMR) (100 MHz,  $\text{CDCl}_3$ )

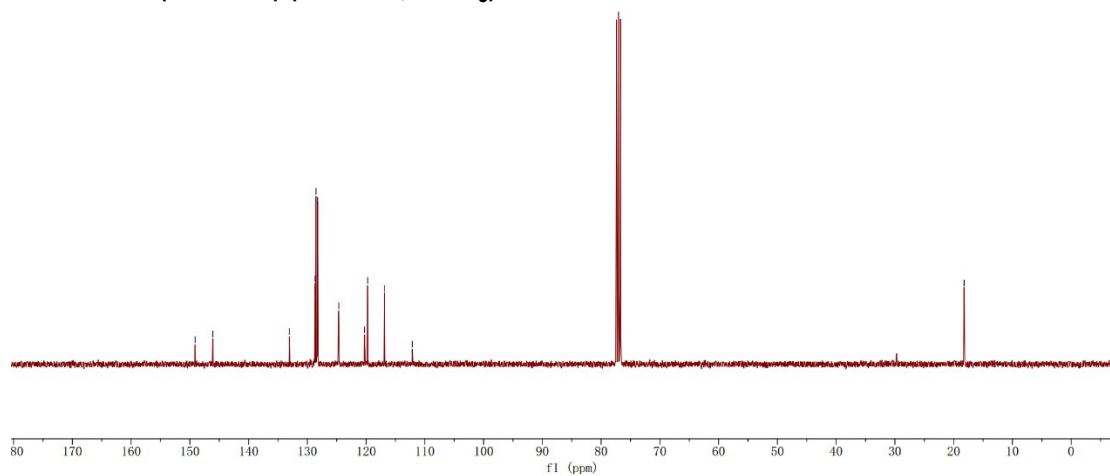

8.390  
8.373  
8.310  
8.307  
8.293  
8.289  
8.286  
7.519  
7.501  
7.497  
7.485  
7.481  
7.469  
7.466  
7.463  
7.421  
7.402  
7.387  
7.384  
7.381  
6.815  
6.810  
6.797  
6.793

-2.472  
-2.276

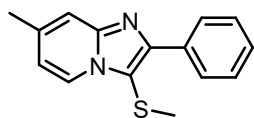

2t (<sup>1</sup>H NMR) (400 MHz, CDCl<sub>3</sub>)

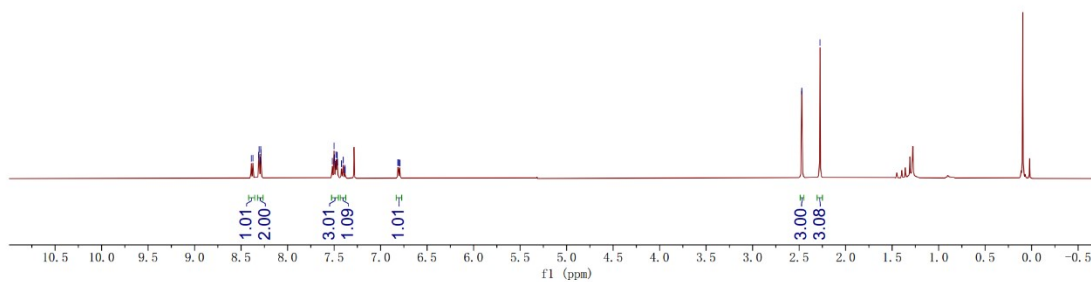

148.481  
146.617  
137.278  
133.811  
128.370  
128.217  
128.198  
123.458  
116.078  
115.445  
110.703

-21.387  
-18.322

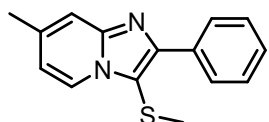

2t (<sup>13</sup>C NMR) (100 MHz, CDCl<sub>3</sub>)

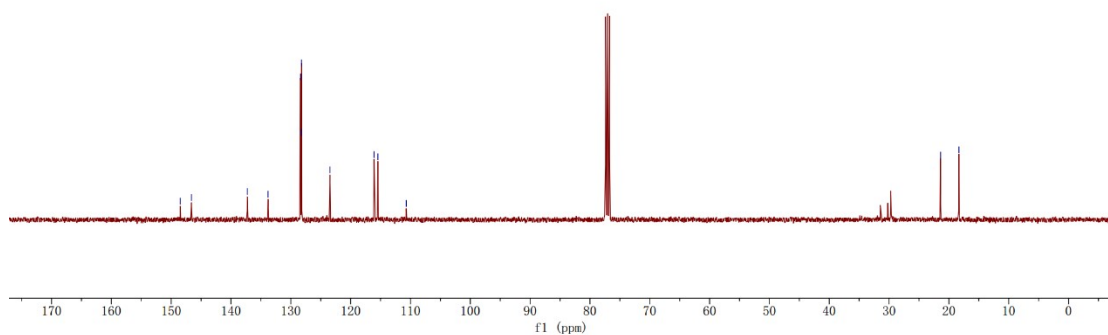

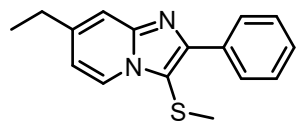

2u (<sup>1</sup>H NMR) (400 MHz, CDCl<sub>3</sub>)

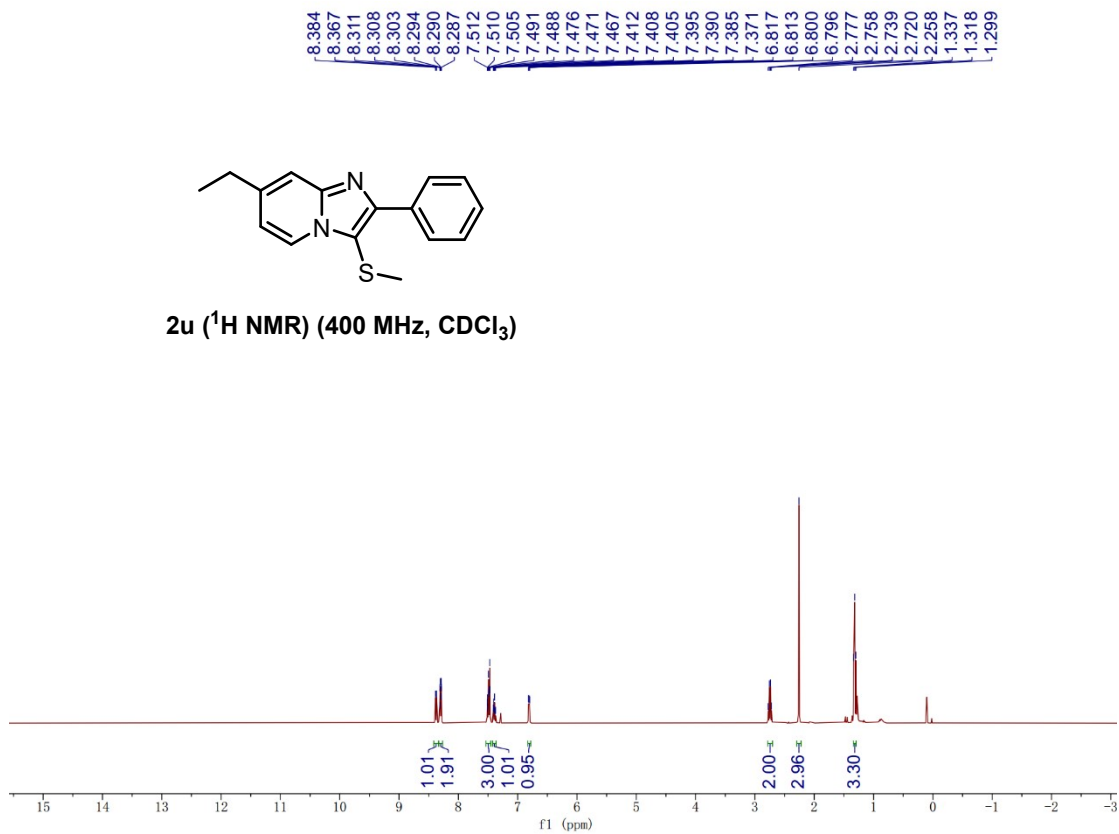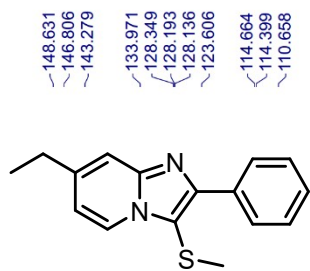

2u (<sup>13</sup>C NMR) (100 MHz, CDCl<sub>3</sub>)

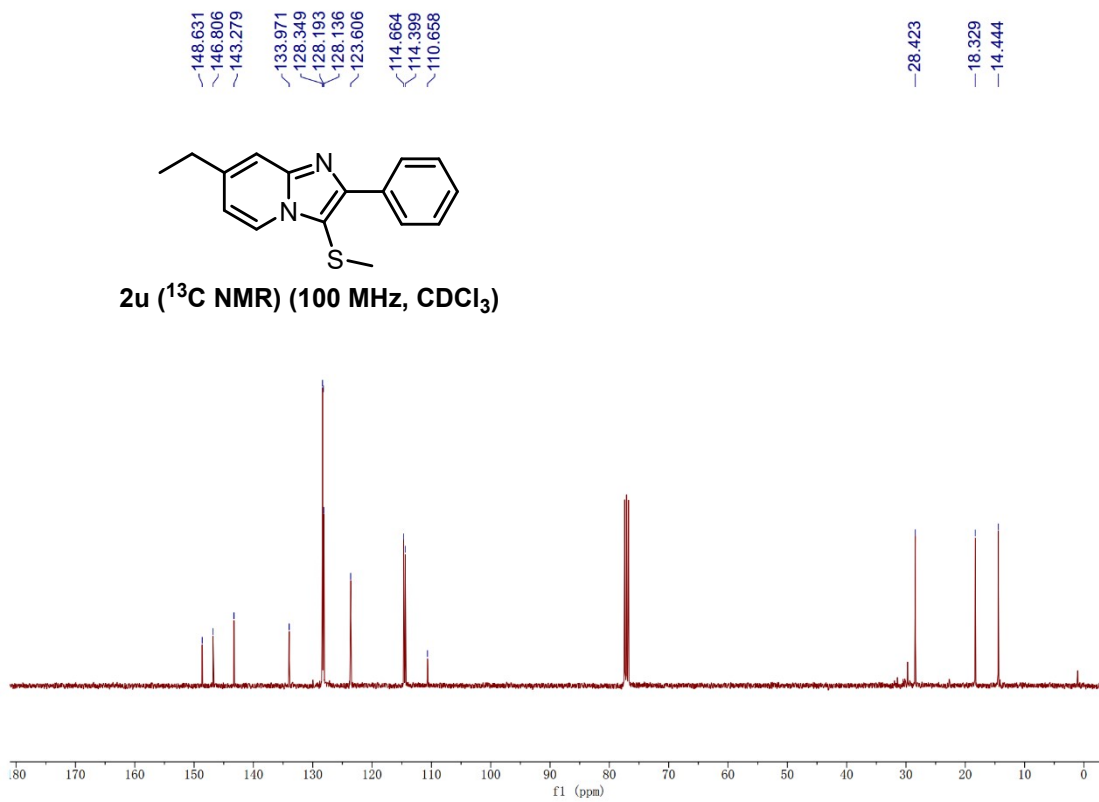

8.556  
8.553  
8.538  
8.535  
8.446  
8.443  
8.440  
8.343  
8.339  
8.334  
8.325  
8.322  
8.319  
8.314  
7.593  
7.589  
7.575  
7.571  
7.554  
7.552  
7.549  
7.545  
7.536  
7.531  
7.527  
7.515  
7.512  
7.510  
7.507  
7.470  
7.466  
7.463  
7.453  
7.448  
7.442  
7.430  
4.010

-2.317

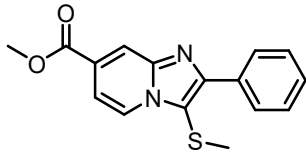

2v (<sup>1</sup>H NMR) (400 MHz, CDCl<sub>3</sub>)

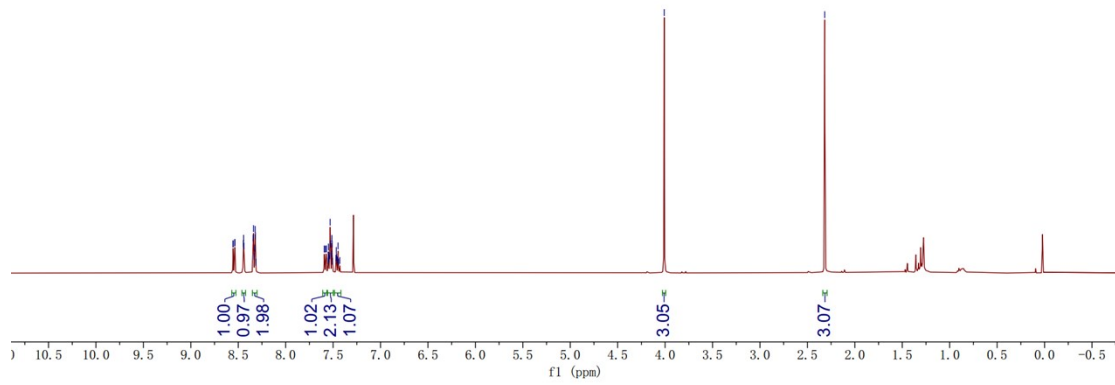

-165.508

-144.977

132.945  
128.861  
128.576  
128.339  
127.579  
124.000  
119.866  
113.764  
112.271

-52.730

-18.076

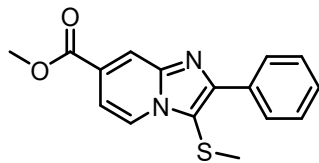

2v (<sup>13</sup>C NMR) (100 MHz, CDCl<sub>3</sub>)

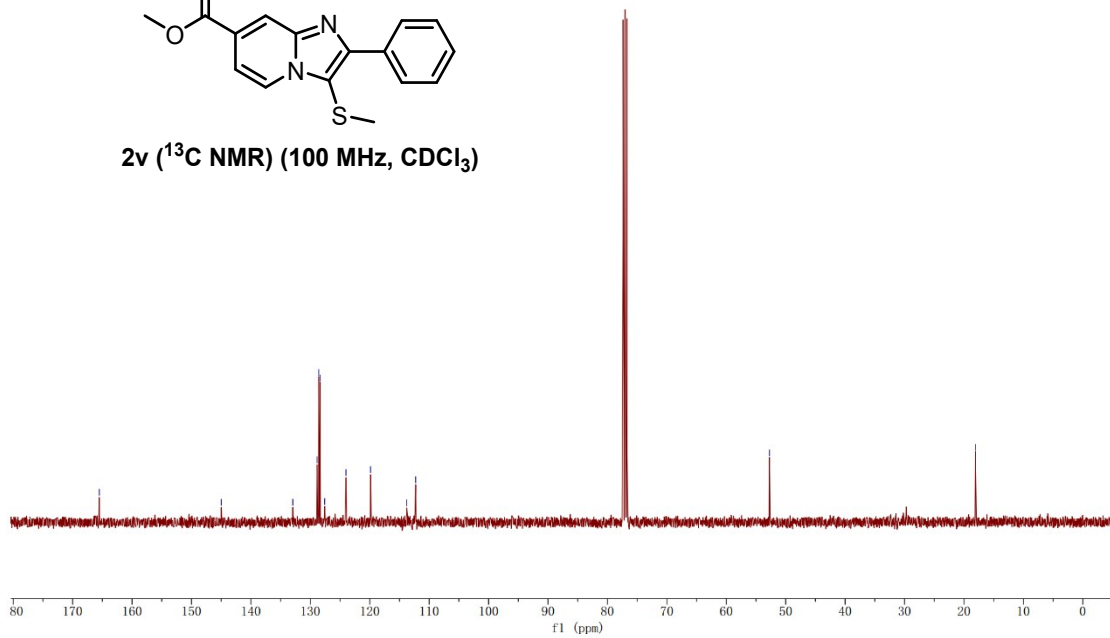



8.419  
8.417  
8.413  
8.410  
8.408  
8.406  
8.402  
8.400  
8.296  
8.292  
8.287  
8.279  
8.275  
8.272  
6.267  
7.659  
7.657  
7.646  
7.644  
7.635  
7.633  
7.622  
7.620  
7.516  
7.514  
7.511  
7.507  
7.498  
7.493  
7.490  
7.478  
7.474  
7.469  
7.424  
7.420  
7.417  
7.407  
7.402  
7.396  
7.387  
7.383  
7.380  
7.229  
7.223  
7.209  
7.204  
7.198  
7.185  
7.179  
2.262

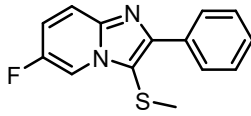

2w (<sup>1</sup>H NMR) (400 MHz, CDCl<sub>3</sub>)

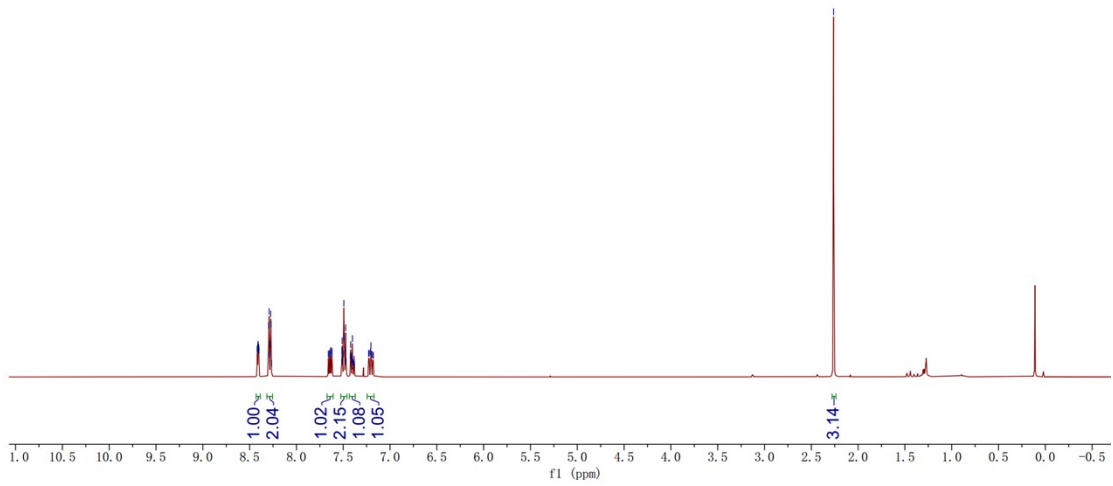

154.972  
152.610  
150.032  
150.008  
143.855  
133.582  
128.453  
128.439  
128.096  
118.190  
118.103  
117.910  
117.655  
112.907  
111.318  
110.905

18.028

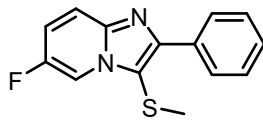

2w (<sup>13</sup>C NMR) (100 MHz, CDCl<sub>3</sub>)

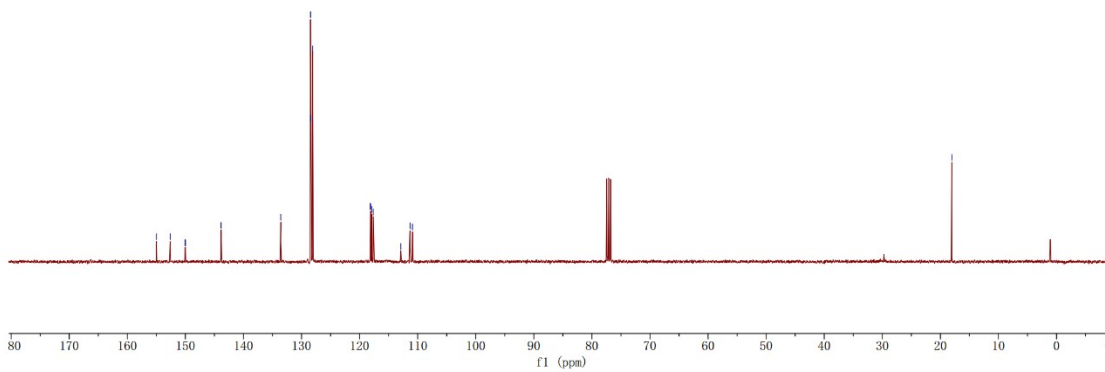

8.541  
8.539  
8.536  
8.534  
8.312  
8.308  
8.303  
8.294  
8.290  
8.287  
7.648  
7.646  
7.624  
7.622  
7.530  
7.527  
7.523  
7.509  
7.506  
7.494  
7.490  
7.485  
7.444  
7.441  
7.437  
7.428  
7.424  
7.422  
7.407  
7.404  
7.401  
7.294  
7.289  
7.271  
7.266

-2.296

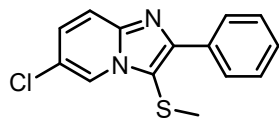

2x (<sup>1</sup>H NMR) (400 MHz, CDCl<sub>3</sub>)

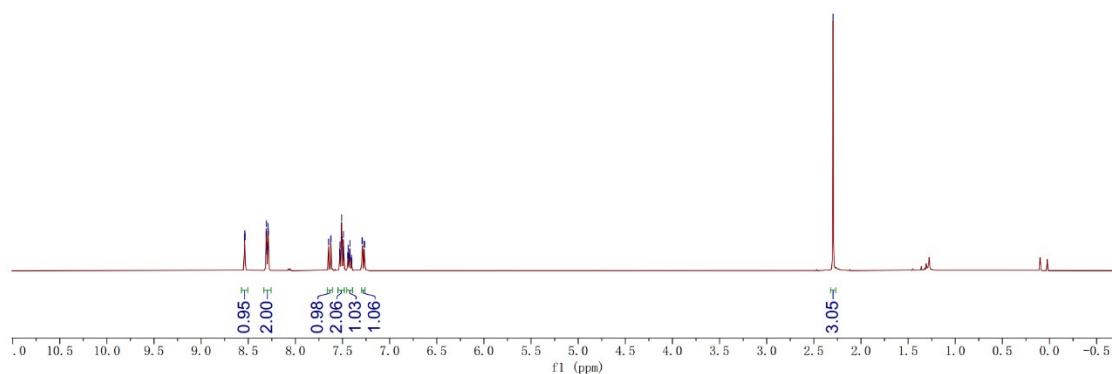

-149.579  
-144.597  
133.334  
128.583  
128.496  
128.180  
127.365  
122.310  
121.318  
118.012  
112.244

-18.232

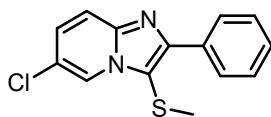

2x (<sup>13</sup>C NMR) (100 MHz, CDCl<sub>3</sub>)

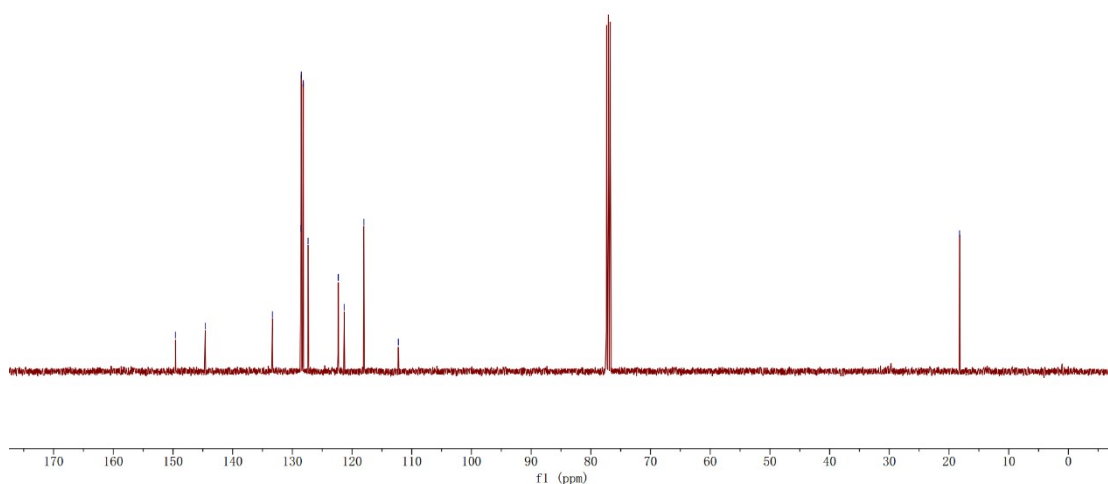

8.864  
8.345  
8.340  
8.323  
8.320  
7.800  
7.776  
7.546  
7.544  
7.539  
7.526  
7.522  
7.507  
7.480  
7.475  
7.466  
7.463  
7.457  
7.451  
7.444  
7.438  
7.429  
7.426

2.320

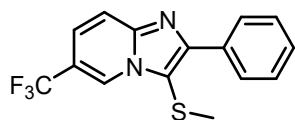

2y (<sup>1</sup>H NMR) (400 MHz, CDCl<sub>3</sub>)

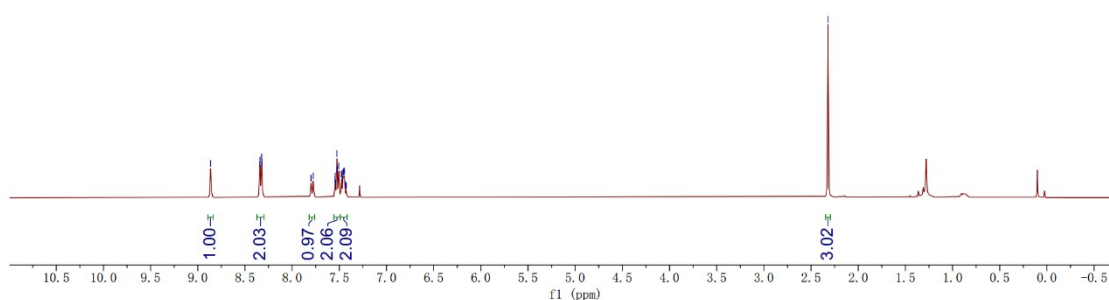

150.450  
146.047  
133.031  
128.864  
128.565  
128.270  
124.977  
123.349  
123.294  
122.281  
121.905  
121.877  
118.302  
117.433  
117.093  
113.345

18.342

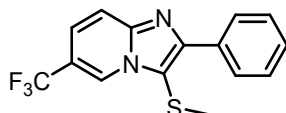

2y (<sup>13</sup>C NMR) (100 MHz, CDCl<sub>3</sub>)

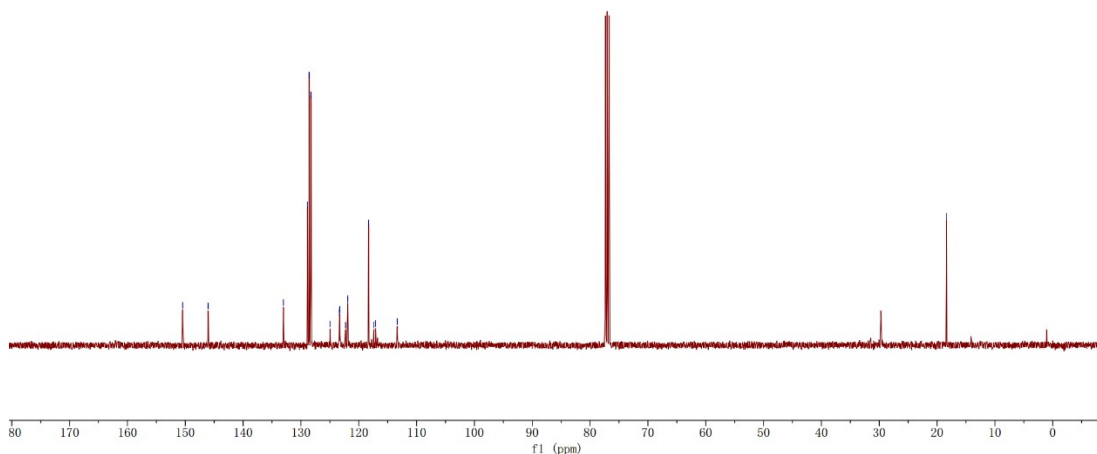

8.411  
8.409  
8.394  
8.392  
8.340  
8.336  
8.332  
8.323  
8.319  
8.316  
7.517  
7.515  
7.497  
7.493  
7.481  
7.477  
7.427  
7.409  
7.390  
7.357  
7.354  
7.339  
7.336  
6.874  
6.857  
6.839

-2.255

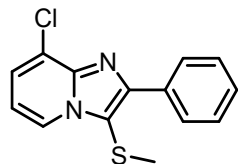

**2z** ( $^1\text{H}$  NMR) (400 MHz,  $\text{CDCl}_3$ )

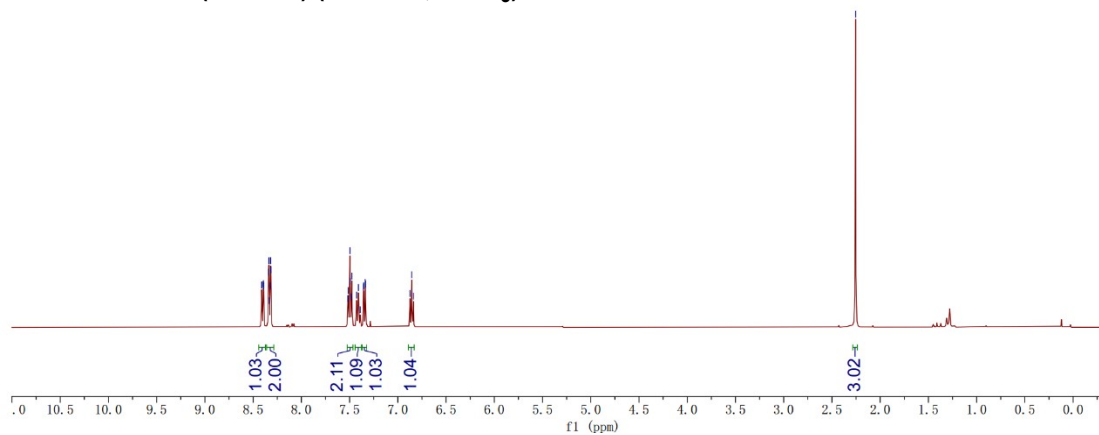

149.485  
143.551  
133.393  
128.796  
128.516  
128.387  
124.852  
123.376  
123.075  
113.403  
112.296

-18.221

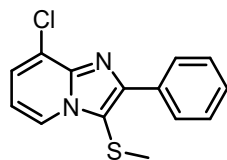

**2z** ( $^{13}\text{C}$  NMR) (100 MHz,  $\text{CDCl}_3$ )

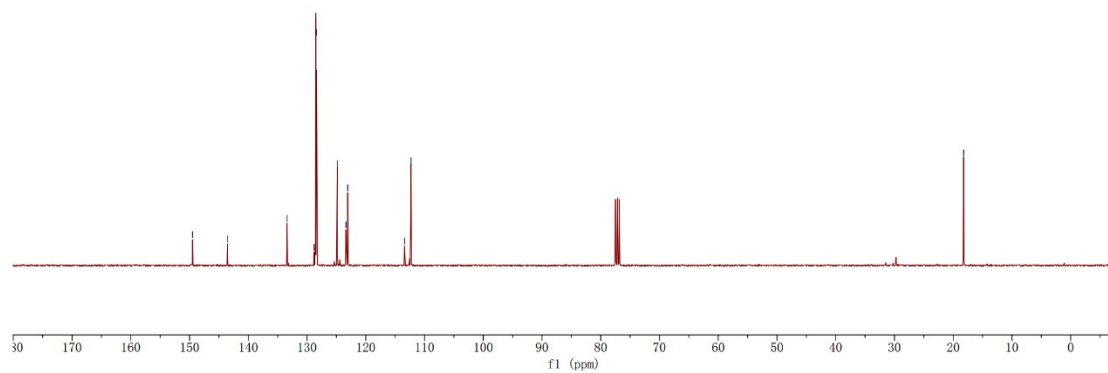

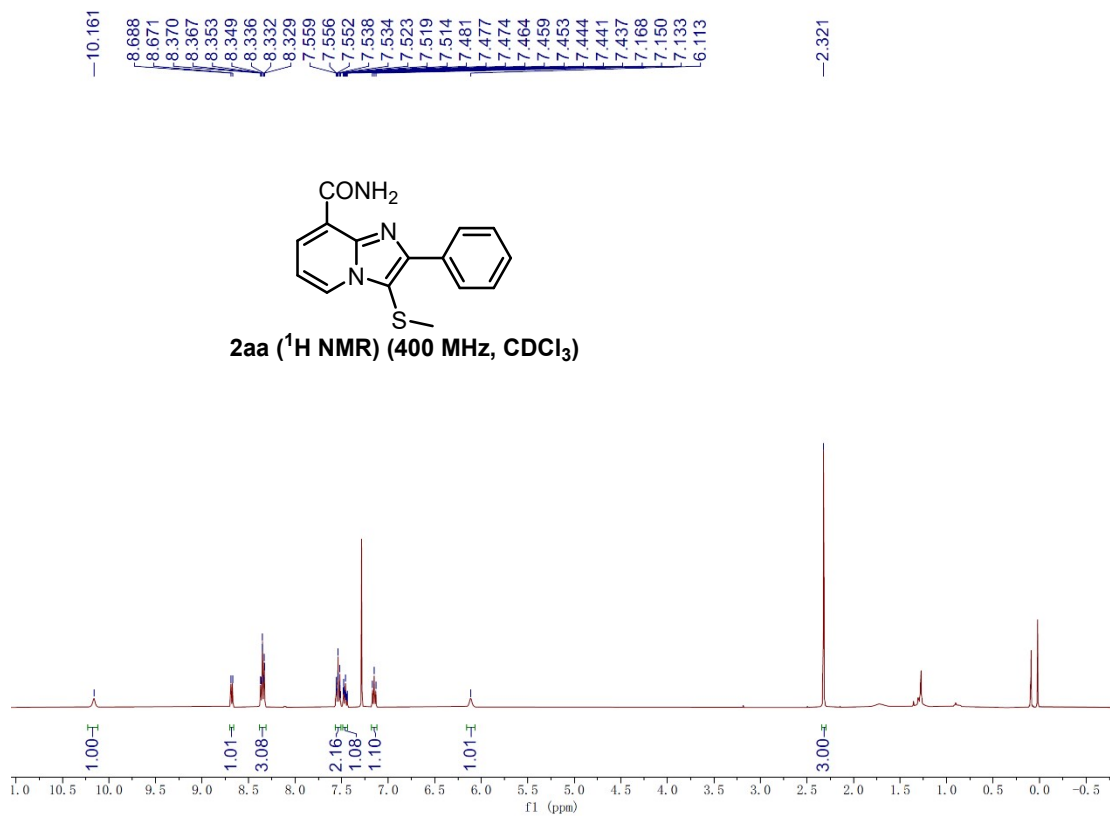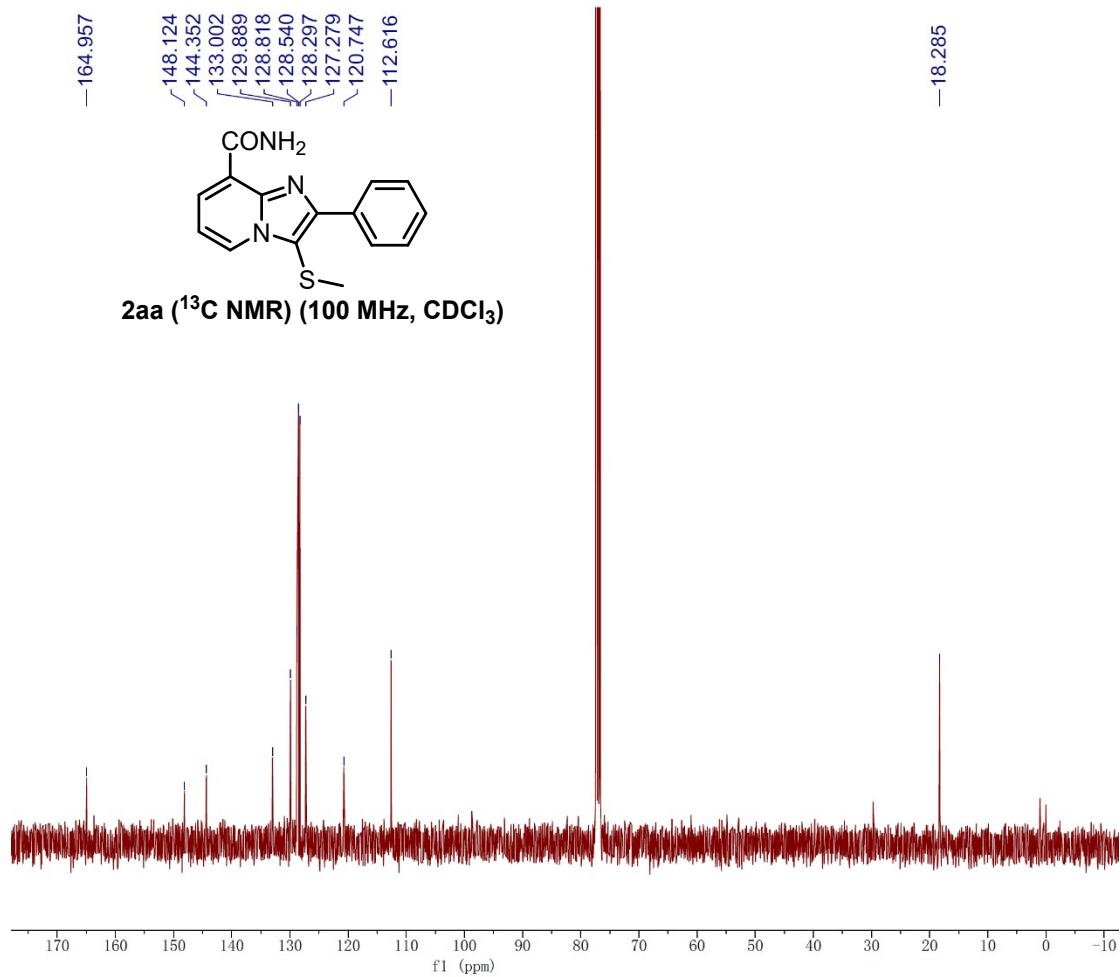

8.522  
8.505  
8.331  
8.327  
8.323  
8.310  
8.307  
8.302  
7.725  
7.702  
7.532  
7.530  
7.526  
7.512  
7.508  
7.496  
7.492  
7.488  
7.437  
7.434  
7.431  
7.421  
7.416  
7.410  
7.400  
7.397  
7.394  
7.351  
7.348  
7.345  
7.335  
7.331  
7.327  
7.325  
7.322  
7.312  
7.309  
7.305  
6.989  
6.986  
6.976  
6.972  
6.969  
6.959  
6.955  
6.952

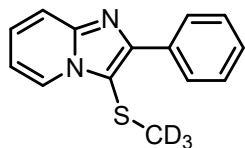

**2a-d<sub>3</sub> (<sup>1</sup>H NMR) (400 MHz, CDCl<sub>3</sub>)**

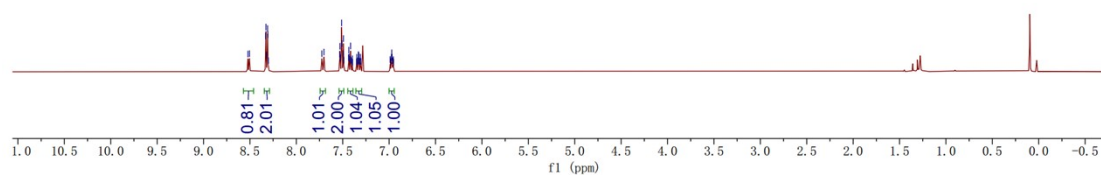

148.689  
146.246  
133.687  
128.420  
128.337  
128.285  
126.069  
124.287  
117.606  
112.829  
112.675

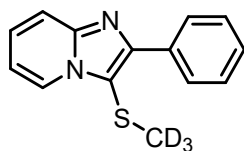

**2a-d<sub>3</sub> (<sup>13</sup>C NMR) (100 MHz, CDCl<sub>3</sub>)**

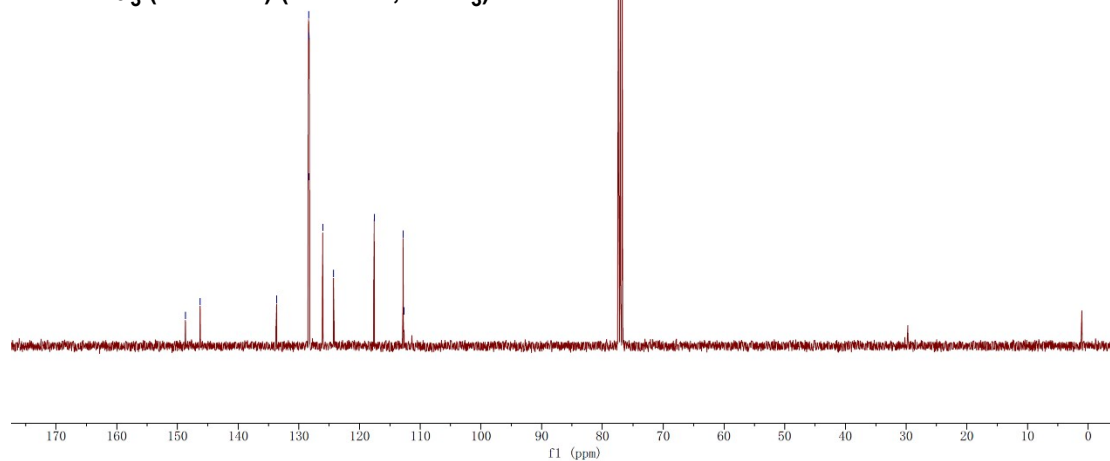

9.092  
9.075  
7.843  
7.826  
7.803  
7.780  
7.522  
7.505  
7.486  
7.472  
7.467  
7.454  
7.446  
7.427  
7.040  
7.023  
7.006

—3.151

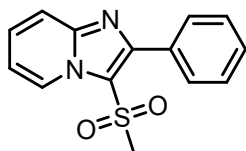

**3 (<sup>1</sup>H NMR) (400 MHz, CDCl<sub>3</sub>)**

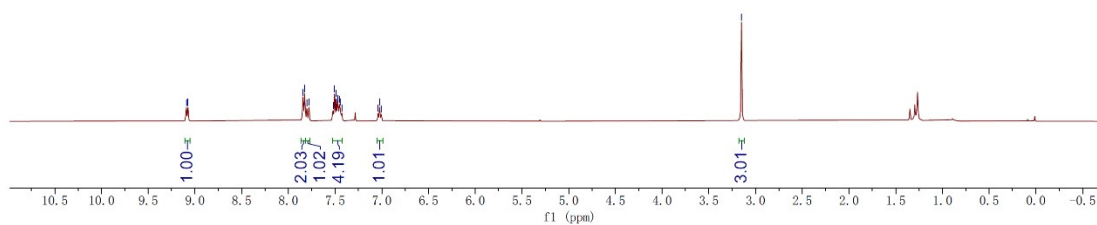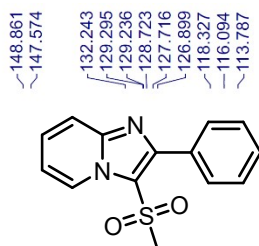

**3 (<sup>13</sup>C NMR) (100 MHz, CDCl<sub>3</sub>)**

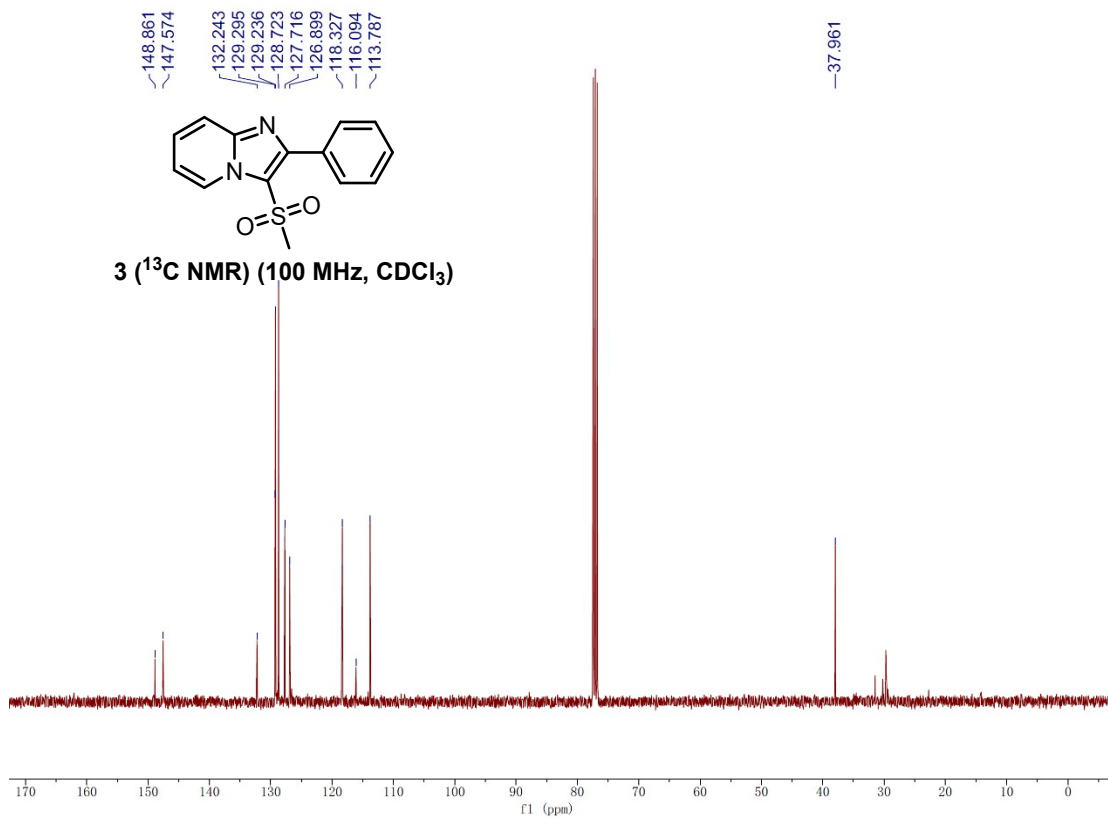

Supplement: d4gc00314d1.pdf [file d4gc00314d1.pdf]
